# Supplementary material for: Combining NMR Spectroscopy and Chemometrics to Monitor Structural Features of Crude Hep-arin
Source: PubMed Central journal article supplement (PMC6152302; doi:10.3390/molecules22071146), 2017-07-08
Supplement: molecules-22-01146-s001.pdf [file molecules-22-01146-s001.pdf]

# Supporting Information

*Article*

**Combining NMR spectroscopy and chemometrics to monitor structural features of crude heparin.**

**Lucio Mauri<sup>1</sup>, Maria Marinozzi<sup>1</sup>, Giulia Mazzini<sup>1</sup>, Richard E. Kolinski<sup>2</sup>, Michael Karfunkle<sup>2</sup>, David A. Keire<sup>2</sup>, Marco Guerrini<sup>1\*</sup>**

<sup>1</sup>Institute for Chemical and Biochemical Research G. Ronzoni, via G. Colombo 81, 20133 Milan, Italy

<sup>2</sup> Division of Pharmaceutical Analysis, Office of Testing and Research, Center for Drug Evaluation and Research, U.S. Food and Drug Administration, 645 S. Newstead Ave., St. Louis, MO 63110, USA

\*Correspondence: guerrini@ronzoni.it; Tel.: +39-02-70641621

## List of Figures

- **Fig. S1.**  $^1\text{H}$  spectra of the supernatant and re-suspended precipitate.
- **Fig. S2.**  $^1\text{H}$  spectra of crude heparin samples in  $\text{D}_2\text{O}$  and phosphate buffer.
- **Fig. S3.** Loading plot of the first two principal components of PCA of the anomeric region of PMHC spectra.
- **Fig. S4.**  $^1\text{H}$  spectra of crude heparin samples belonging to group A, B and C.
- **Fig. S5.** HSQC spectrum of crude heparin – ring signals region.
- **Fig. S6.** HSQC spectrum of crude heparin – anomeric signals region.
- **Fig. S7.** Score plot of the first two components of the PCA of the glycosaminoglycan regions, showing samples of crude heparin from different origins.
- **Fig. S8.** Loading plots of the first and third component of the PCA of the anomeric region of PMHC spectra.
- **Fig. S9.** Results of the alignment algorithm.

## List of Tables

- **Table S1.** Summary results of preparation procedure.
- **Table S2.** HSQC Integration regions.
- **Table S3.** Formulas for the HSQC quantification.
- **Table S4.** Plackett-Burman design for the HSQC robustness study.
- **Table S5.** Results of the HSQC quantification for the Plackett-Burman design.
- **Table S6.** Effects of factors of the Plackett-Burman design.
- **Table S7.** Experimental design for the HSQC intermediate precision study.
- **Table S8.** Results of the HSQC quantification for the intermediate precision experiments.
- **Table S9.** Results of the HSQC intermediate precision study.
- **Table S10.** HSQC molar percentages of glucosamine residues of 75 porcine crude heparin samples.
- **Table S11.** HSQC molar percentages of uronic acids residues of 75 porcine crude heparin samples.
- **Table S12.** HSQC percentages of GAGs of 75 porcine crude heparin samples.
- **Table S13.** Linkage region and sulfation degree of 75 porcine crude heparin samples.
- **Table S14.** Alignment algorithm.

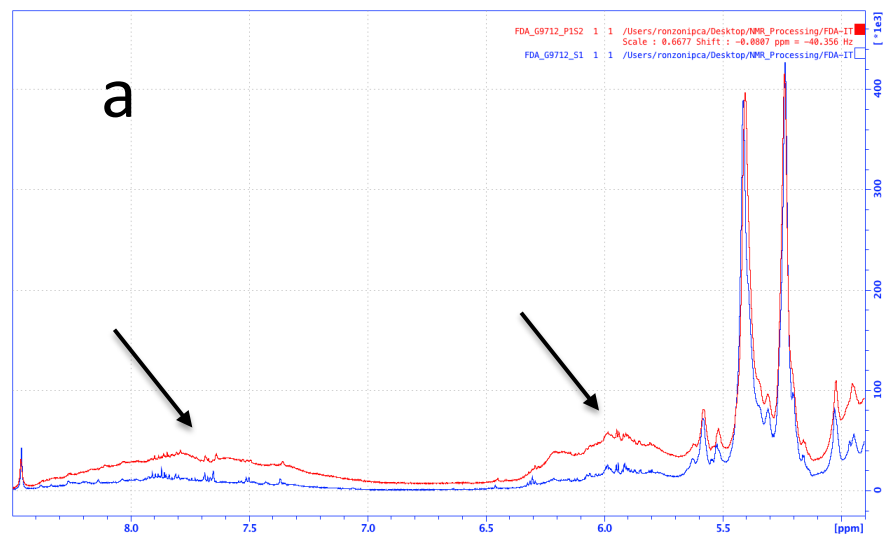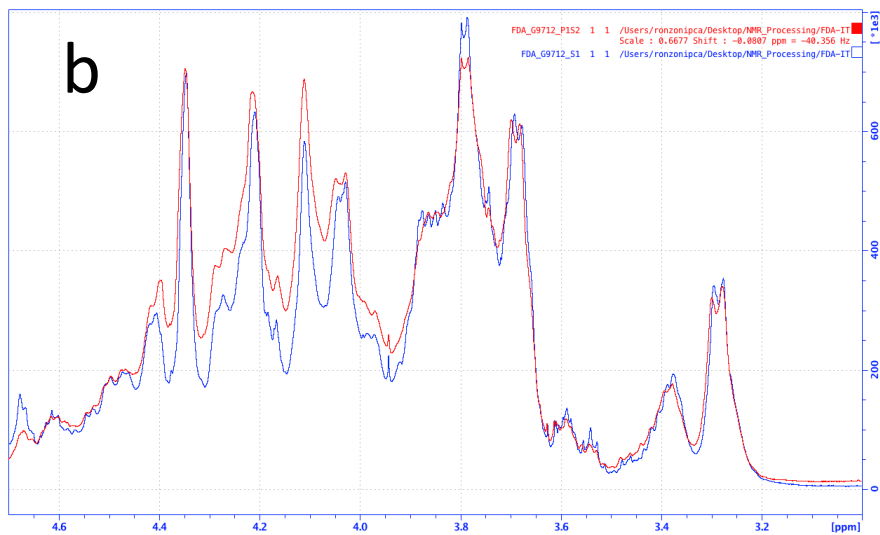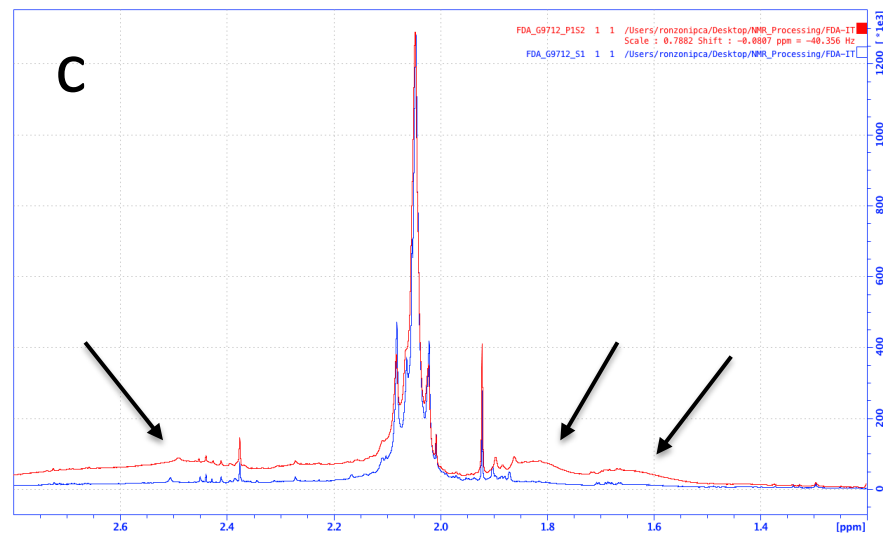

**Fig. S1.** Low field (a) middle field (b) and high field (c)  $^1\text{H}$  spectra of crude heparin samples. The spectrum of the supernatant and re-suspended precipitate are shown in blue and red, respectively. Arrows indicate broad signal due to nucleic acid material.

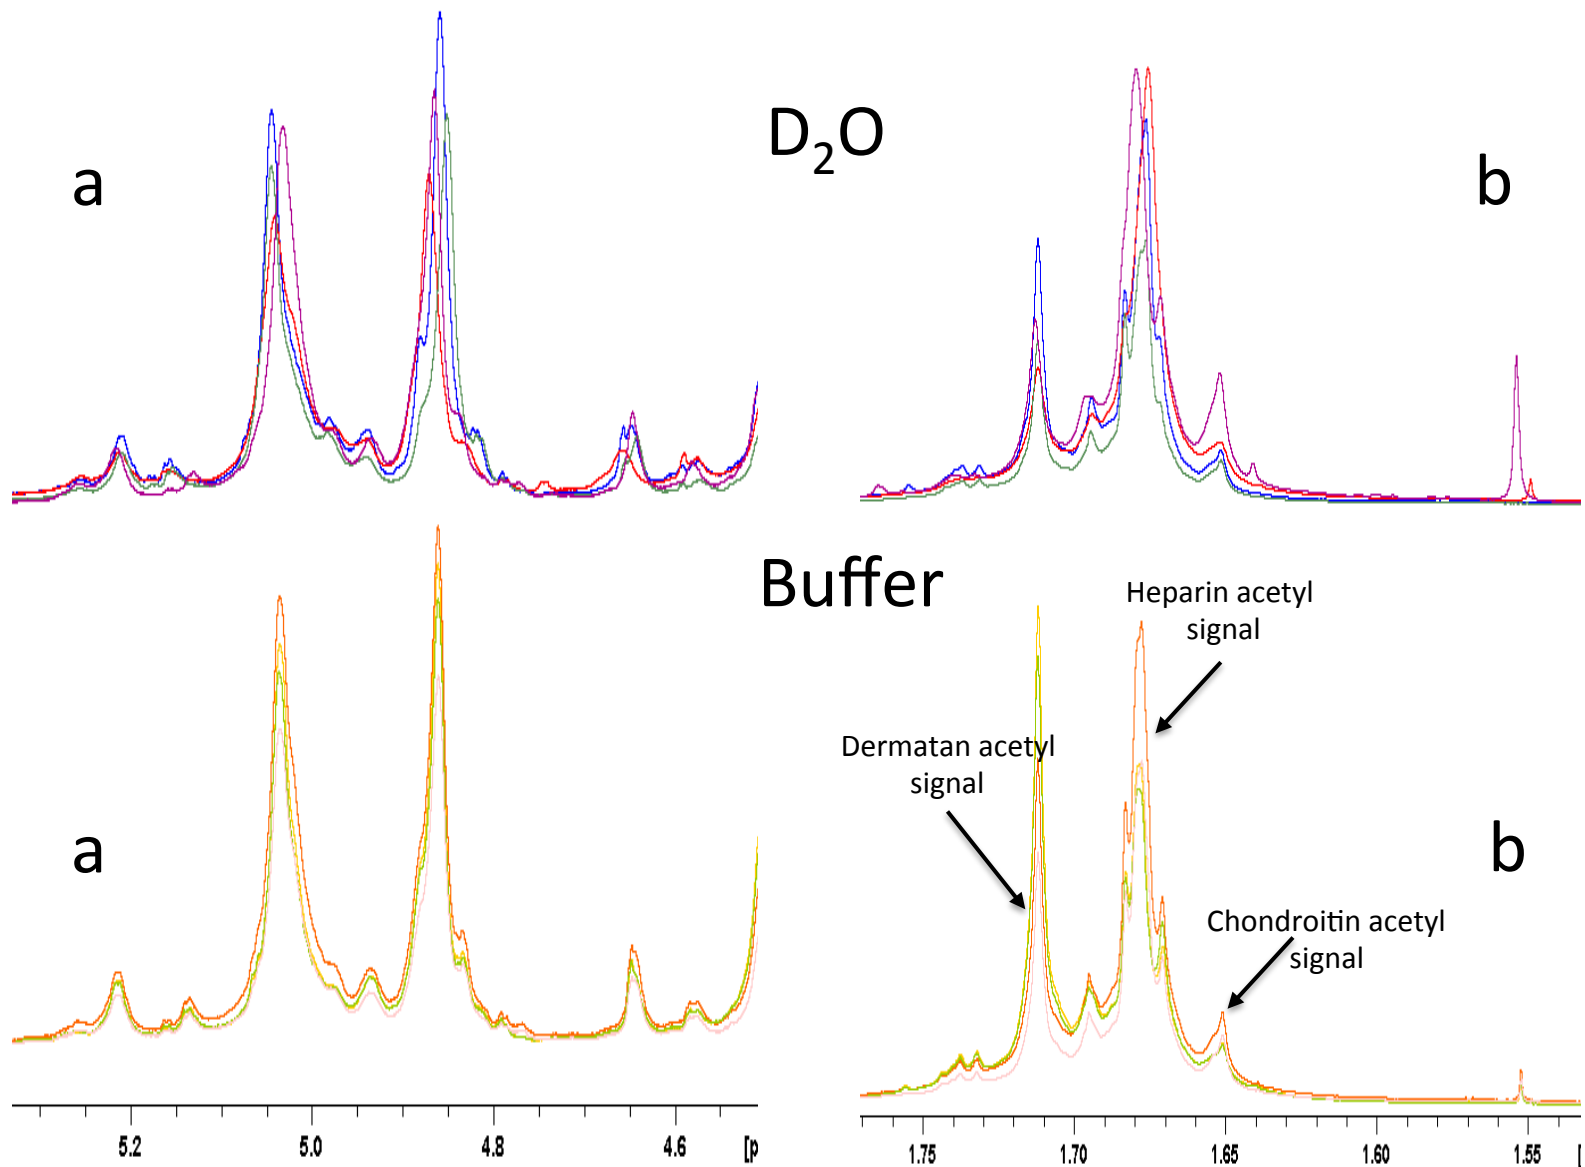

**Fig. S2.** Anomeric region (a) and acetyl region (b) of four  $^1\text{H}$  spectra of crude heparin samples in  $\text{D}_2\text{O}$  and phosphate buffer, respectively. Arrows indicate the acetyl signals of heparin, dermatan and chondroitin components.



## Loadings Plots - Components 1, 2

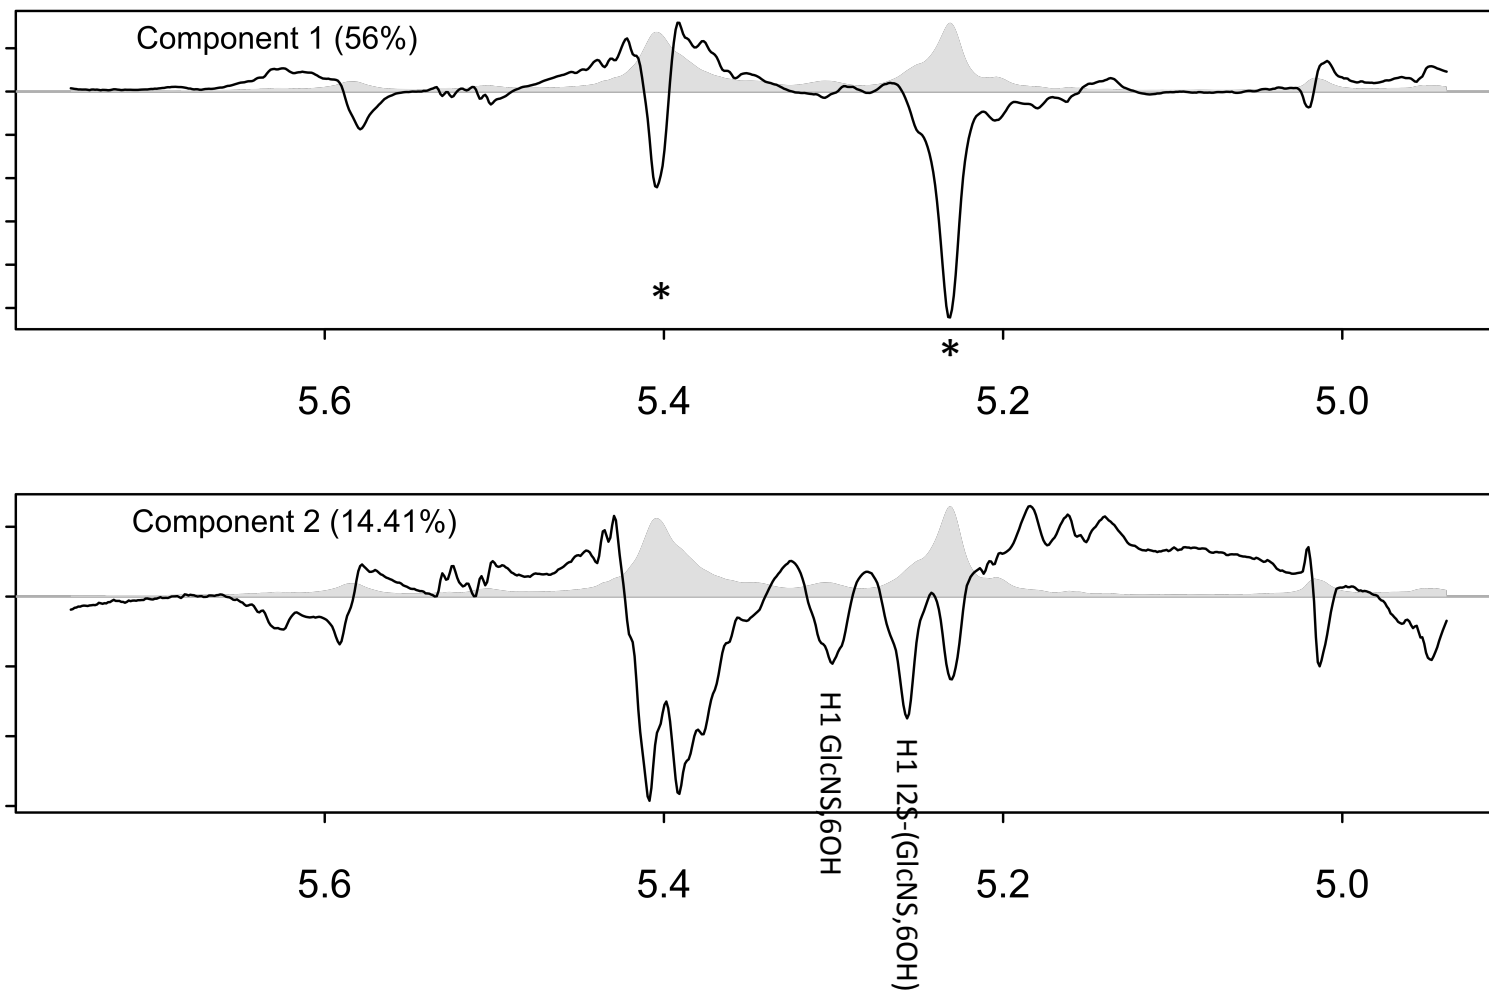

**Fig. S3.** Loading plot of the first two components derived from the PCA of part of the anomeric region. In the loading plot of component 1, negative signals corresponding to the trisulfated disaccharide (\*) (-I2S-GlcNS,6S-) are observed. Negative signals corresponding to the H1 of GlcNS,6OH and I2S linked to GlcNS,6OH are observed in the loading plot of the component 2.

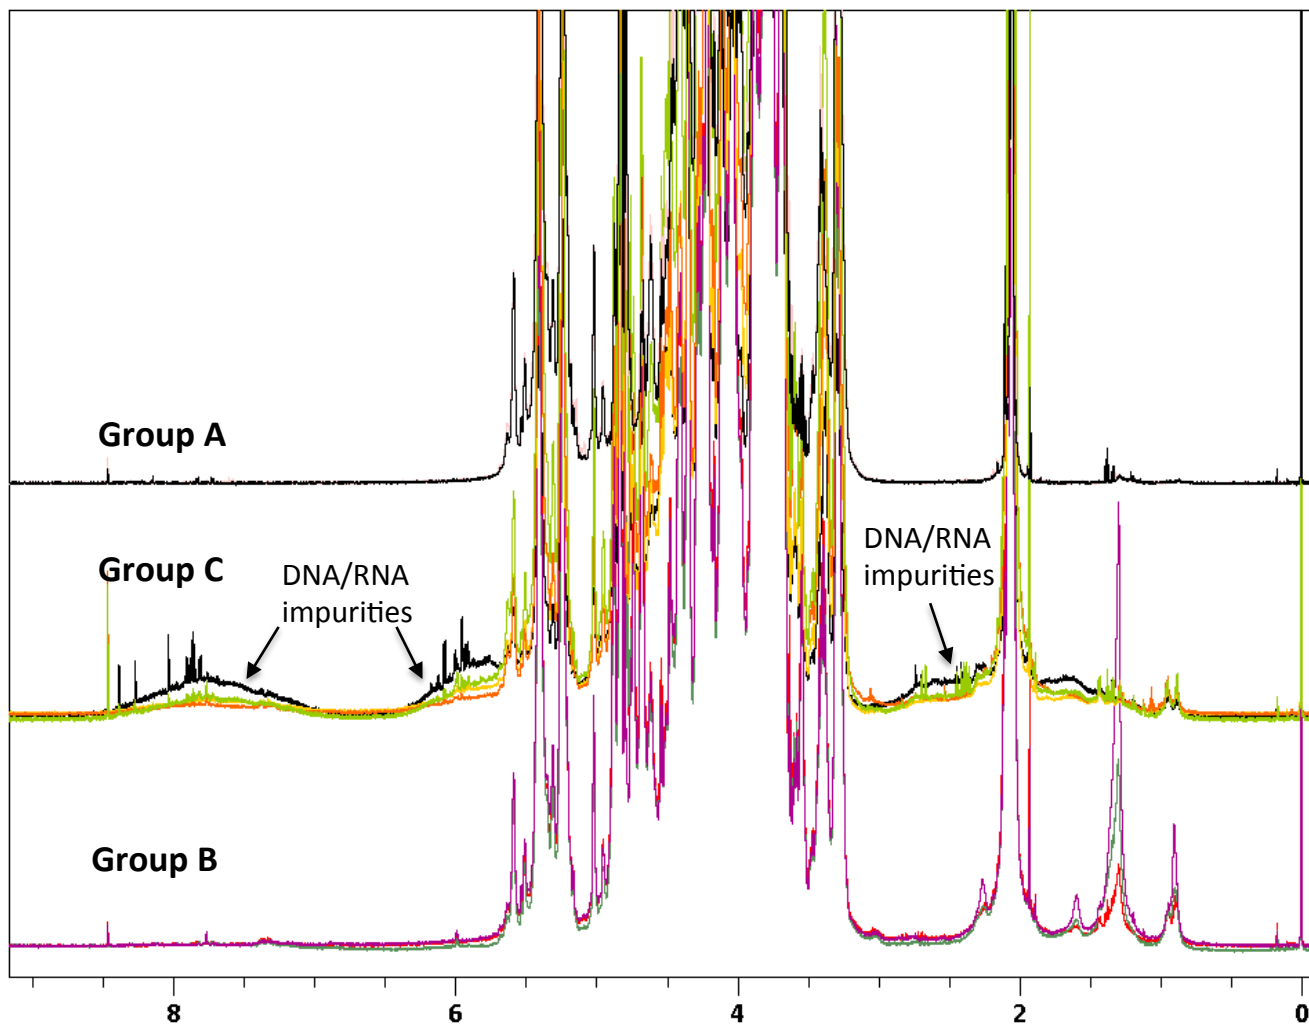

**Fig. S4.**  $^1\text{H}$  spectra of crude heparin samples belonging to group A, B and C.

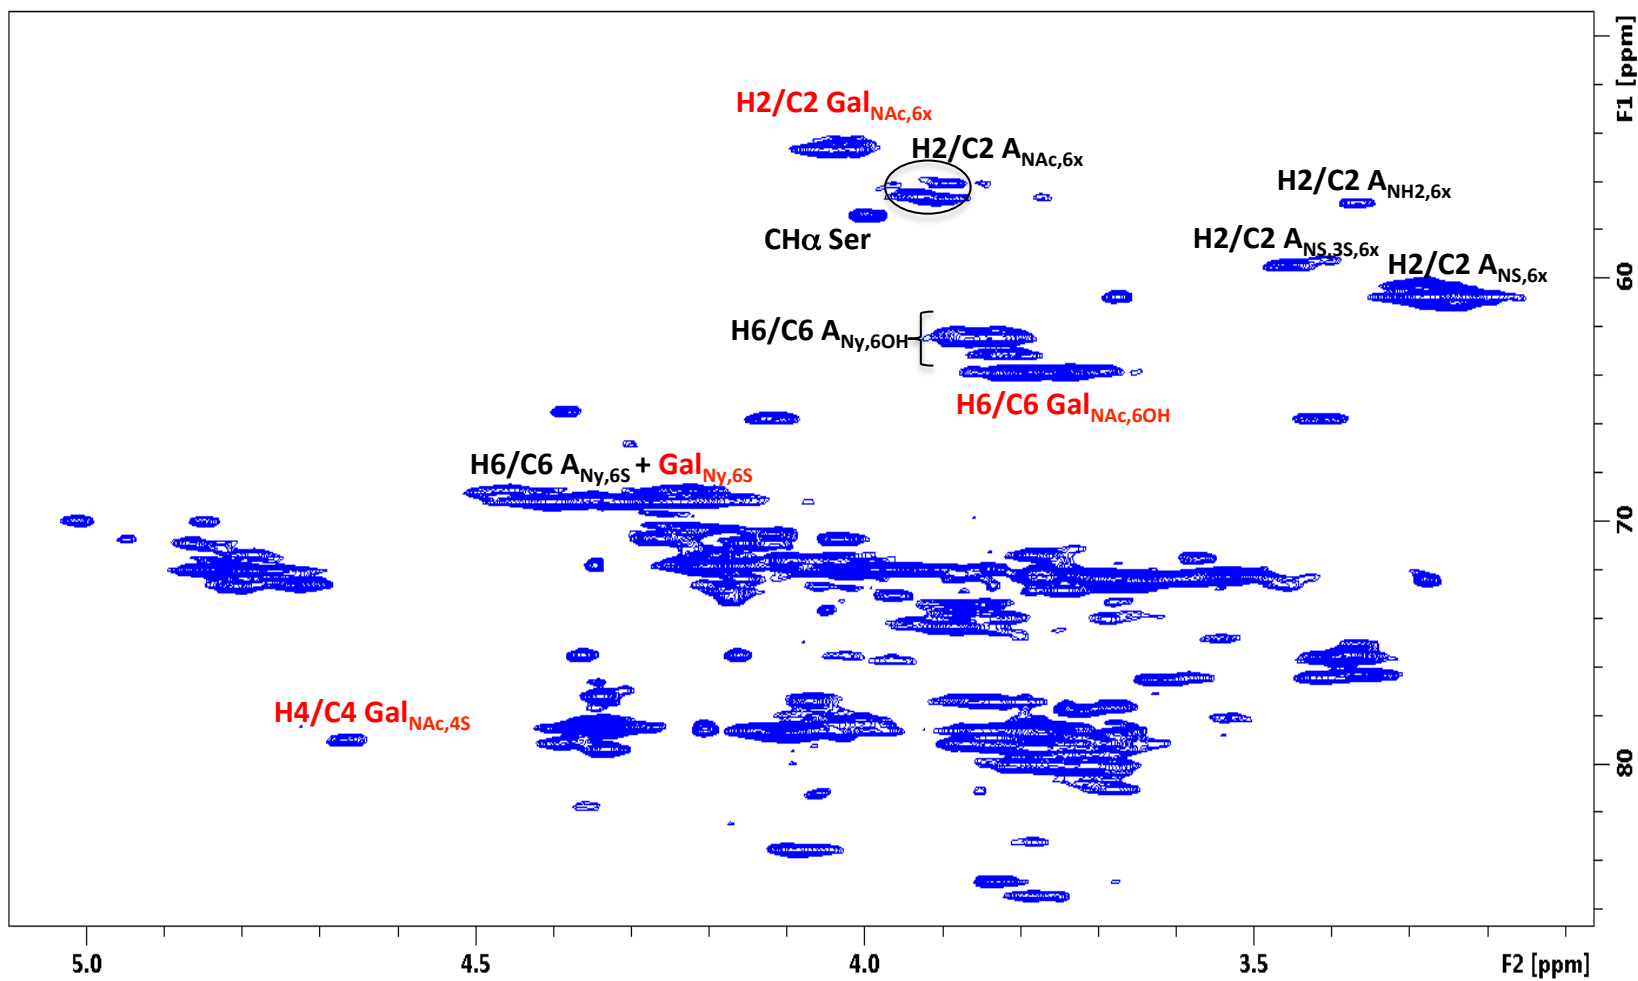

**Fig. S5.** Ring region of the HSQC spectrum of crude heparin. Signal assignments of heparin and DeS/ChS components are in black and red, respectively.

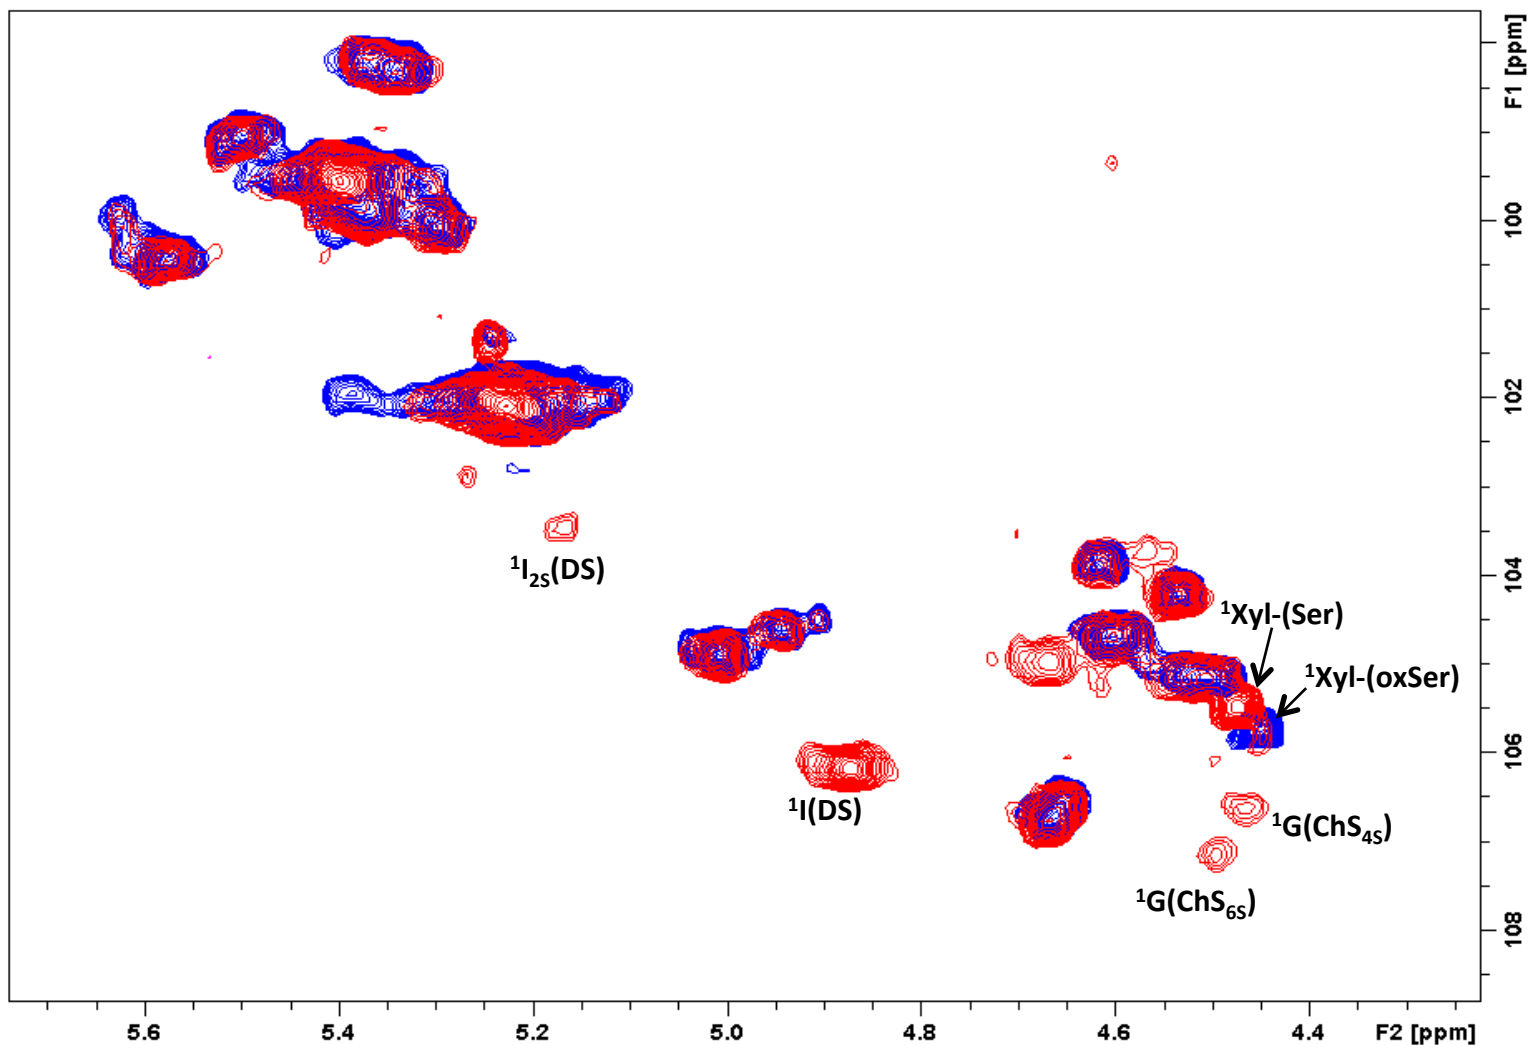

**Fig. S6.** Anomeric region of the HSQC spectra of crude heparin samples. Overlay of an HSQC spectrum of a crude heparin sample with 100% oxidized serine (blue) and one without oxidation (red).

## Scores Plot - Components 1 and 2

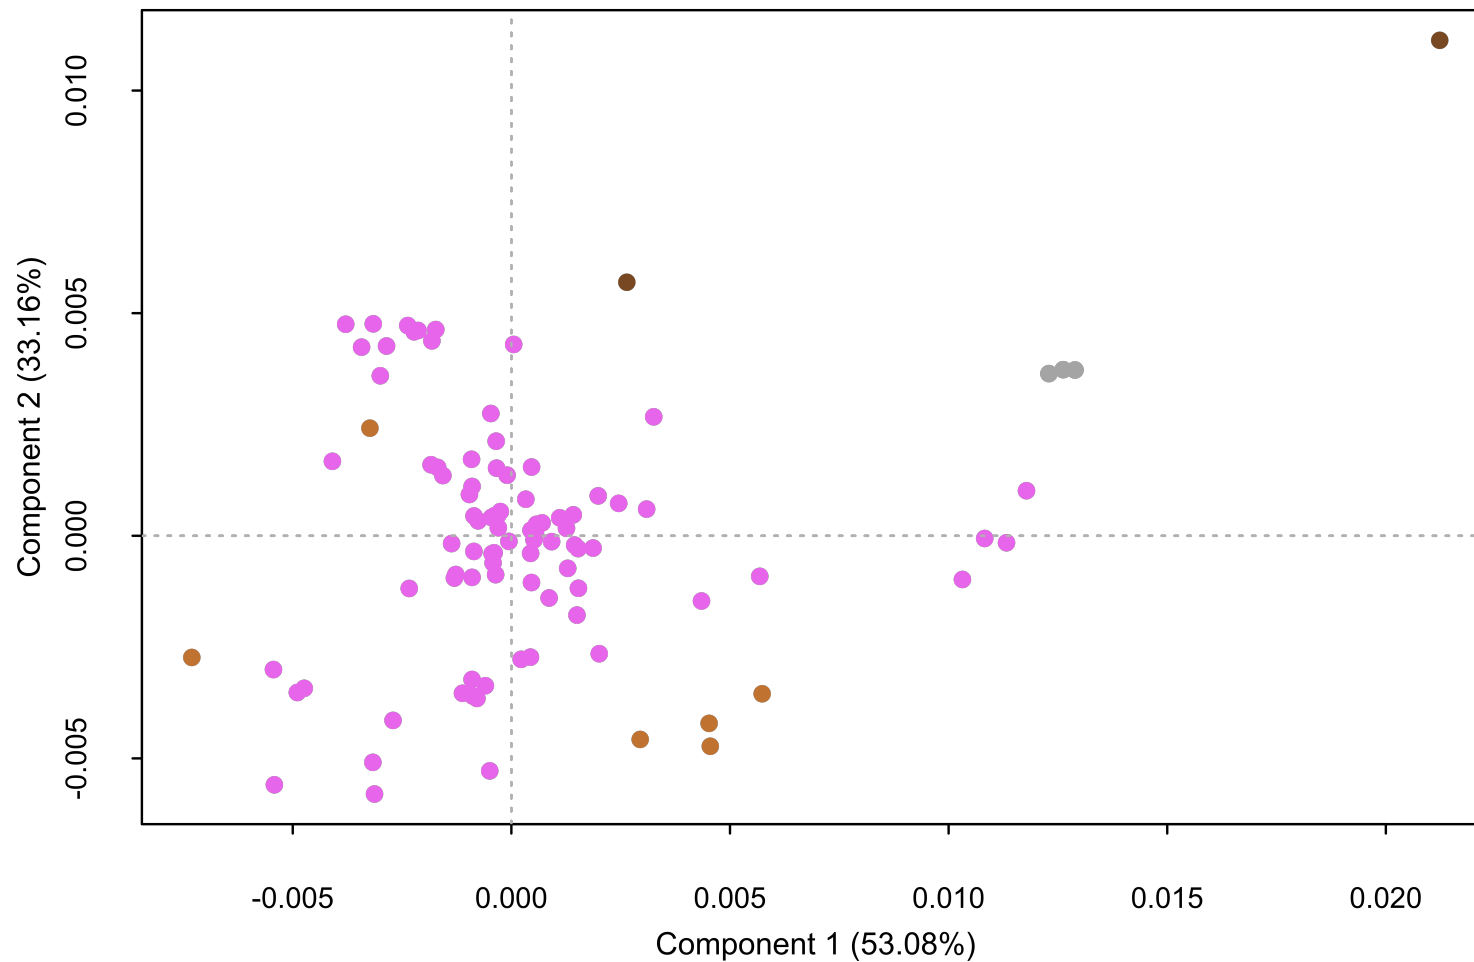

**Fig. S7.** Score plot of the first two components generated by PCA of BMHC (brown), OMHC (gray) and BLHC (dark brown), against the library of PMHC (violet). Glycosaminoglycan regions of proton spectra were used.

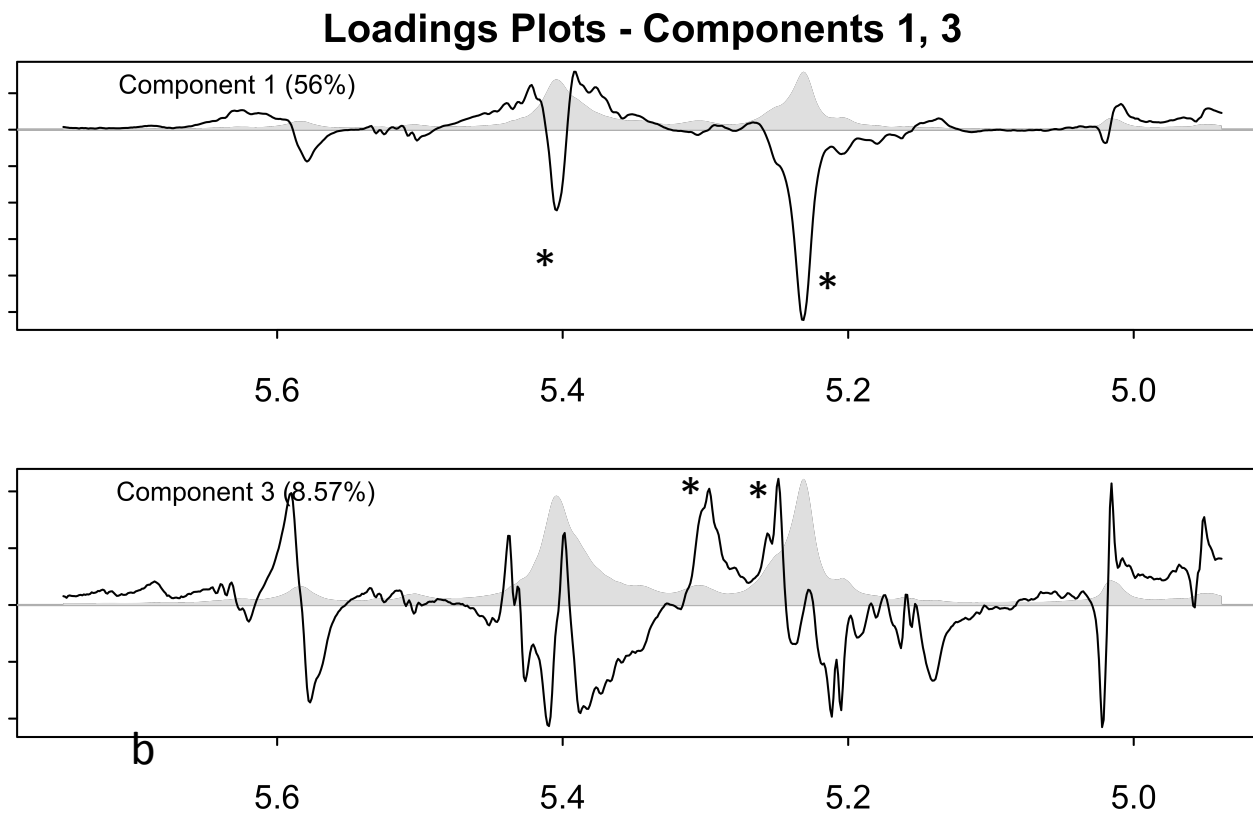

**Fig. S8.** Loading plots of the first and third component of the PCA of the anomeric region of PMHC spectra. Asterisks indicate the signals corresponding to the H1 of GlcNS,6S-IdoA2S disaccharide in the loading of the component 1 (negative) and H1 GlcNS,OH-IdoA2S disaccharide in the loading of the component 3 (positive).

|               | <b>Weight loss %</b> | <b>Precipitate %</b> | <b>Solubilized %</b> |
|---------------|----------------------|----------------------|----------------------|
| <b>mean</b>   | 8.8                  | 5.6                  | 85.6                 |
| <b>median</b> | 9.7                  | 4.2                  | 86.4                 |
| <b>stdev</b>  | 4.4                  | 4.7                  | 5.8                  |
| <b>CV%</b>    | 49.7                 | 84.1                 | 6.8                  |
| <b>MIN</b>    | 0.0                  | 0.0                  | 64.6                 |
| <b>MAX</b>    | 20.5                 | 27.6                 | 96.1                 |

**Table S1.** Summary results of preparation procedure on 88 samples (weight loss after lyophilization, soluble and insoluble components).

| N  | Comp   | C# | Name in text                                                                             | Name in formulas | F1     |        | F2   |      |
|----|--------|----|------------------------------------------------------------------------------------------|------------------|--------|--------|------|------|
| 1  | HEP    | 2  | <sup>2</sup> A <sub>NS,6X</sub>                                                          | 2ANS6X           | 62.28  | 59.79  | 3.40 | 3.14 |
| 2  | HEP    | 2  | <sup>2</sup> A <sub>NS,3S,6X</sub>                                                       | 2ANS3S6X         | 59.95  | 58.84  | 3.51 | 3.36 |
| 3  | HEP    | 2  | <sup>2</sup> A <sub>NAC,6X</sub>                                                         | 2ANAc6X          | 57.14  | 55.76  | 4.02 | 3.83 |
| 4  | HEP    | 2  | <sup>2</sup> A <sub>NH2,6X</sub>                                                         | 2ANH26X          | 57.26  | 56.59  | 3.42 | 3.35 |
| 5  | HEP    | 6  | <sup>6</sup> A <sub>NY,3X</sub>                                                          | 6ANY3X           | 63.46  | 61.80  | 3.99 | 3.74 |
| 6  | HEP    | 6  | <sup>6</sup> A <sub>NY,3X,6S</sub>                                                       | 6ANY3X6S         | 70.06  | 68.29  | 4.59 | 4.11 |
| 7  | HEP    | 1  | <sup>1</sup> A <sub>NS,6X</sub> -(G)                                                     | 1ANS6X_G         | 100.99 | 99.74  | 5.66 | 5.52 |
| 8  | HEP    | 1  | <sup>1</sup> A <sub>NS,3S,6X</sub>                                                       | 1ANS3S6X         | 99.32  | 98.69  | 5.56 | 5.49 |
| 9  | HEP    | 1  | <sup>1</sup> A <sub>NS,6X</sub> -(I <sub>2S</sub> ) + <sup>1</sup> A <sub>NAC</sub> -(G) | Atot             | 100.81 | 99.01  | 5.48 | 5.26 |
| 10 | HEP    | 1  | <sup>1</sup> A <sub>NS,6X</sub> -(I)                                                     | 1ANS6X_I         | 98.75  | 97.88  | 5.43 | 5.30 |
| 11 | HEP    | 1  | <sup>1</sup> A <sub>NAC,6X</sub> -(I)                                                    | 1ANAc6X_I        | 96.85  | 96.22  | 5.17 | 5.13 |
| 12 | HEP    | 1  | <sup>1</sup> A <sub>NS,6X</sub> -αRed                                                    | 1ANS6X_aRed_X    | 94.37  | 93.56  | 5.48 | 5.42 |
| 13 | HEP    | 1  | <sup>1</sup> A <sub>NAC,6X</sub> -αRed                                                   | 1ANAc6X_aRed     | 93.72  | 93.14  | 5.23 | 5.20 |
| 14 | HEP    | 1  | <sup>1</sup> A <sub>NS,6X</sub> -(GalA) + Unk                                            | 1ANS6X_GalA_Unk  | 102.41 | 101.54 | 5.43 | 5.38 |
| 15 | HEP    | 1  | <sup>1</sup> I <sub>2S</sub> -(A <sub>NY,3X,6X</sub> ) + <sup>1</sup> GalA               | I2Stot           | 102.73 | 101.64 | 5.34 | 5.05 |
| 16 | HEP    | 1  | <sup>1</sup> I-(A <sub>NY,6S</sub> )                                                     | 1I_ANY6S         | 105.34 | 104.51 | 5.06 | 4.97 |
| 17 | HEP    | 1  | <sup>1</sup> I-(A <sub>NY</sub> )                                                        | 1I_ANY           | 104.99 | 104.33 | 4.97 | 4.92 |
| 18 | HEP    | 1  | <sup>1</sup> G <sub>X</sub>                                                              | 1GX              | 103.95 | 103.37 | 4.72 | 4.68 |
| 19 | HEP    | 1  | <sup>1</sup> G-(A <sub>NS,3S,6X</sub> )                                                  | 1G_ANS3S6X       | 104.19 | 103.56 | 4.66 | 4.58 |
| 20 | HEP    | 1  | <sup>1</sup> G-(A <sub>NS,6X</sub> )                                                     | 1G_ANS6X         | 105.32 | 104.50 | 4.68 | 4.56 |
| 21 | HEP    | 1  | <sup>1</sup> G-(A <sub>NAC,6X</sub> ) + <sup>1</sup> Xyl-(Ser)                           | 1G_ANAc6X        | 105.73 | 104.84 | 4.56 | 4.45 |
| 22 | HEP    | 1  | <sup>1</sup> Gal-(Xyl)                                                                   | 1Gal_Xyl         | 104.46 | 104.00 | 4.57 | 4.50 |
| 23 | HEP    | 1  | α Serine                                                                                 | 1Xyl_Ser         | 57.69  | 57.04  | 4.03 | 3.98 |
| 24 | HEP    | 1  | <sup>1</sup> Xyl-(oxSer)                                                                 | 1Xyl_oxSer       | 106.11 | 105.58 | 4.48 | 4.43 |
| 25 | HEP    | 1  | <sup>1</sup> G-(Gal) + <sup>1</sup> Gal-(Gal)                                            | 2LR              | 107.14 | 106.22 | 4.71 | 4.61 |
| 26 | HEP    | 5  | <sup>5</sup> GalA                                                                        | 5GalA            | 74.85  | 74.25  | 4.73 | 4.67 |
| 27 | HEP    | 1  | <sup>1</sup> 2,3-epoxide                                                                 | 1epoxide         | 97.78  | 97.24  | 5.45 | 5.41 |
| 28 | HEP    | 1  | <sup>1</sup> I <sub>2S</sub> -(A <sub>NH2,6X</sub> )                                     | 1I2S_ANH26X      | 101.54 | 100.97 | 5.28 | 5.22 |
| 29 | HEP    | 4  | <sup>4</sup> G <sub>NR</sub>                                                             | 4GNR             | 75.24  | 74.53  | 3.59 | 3.51 |
| 30 | HEP    | 3  | <sup>3</sup> G <sub>NR</sub>                                                             | 3GNR             | 78.60  | 77.69  | 3.58 | 3.51 |
| 31 | HEP    | 2  | <sup>2</sup> A <sub>NAC,ox</sub>                                                         | 2ANAc_ox         | 59.56  | 58.41  | 4.42 | 4.33 |
| 32 | ChS    | 1  | <sup>1</sup> G-(GalN <sub>4S</sub> )                                                     | 1G_ChS4S         | 106.86 | 106.27 | 4.50 | 4.44 |
| 33 | ChS    | 1  | <sup>1</sup> G-(GalN <sub>6S</sub> )                                                     | 1G_ChS6S         | 107.26 | 106.88 | 4.52 | 4.48 |
| 34 | DS     | 1  | <sup>1</sup> I-(GalN)                                                                    | 1I_DS            | 106.54 | 105.60 | 4.96 | 4.82 |
| 35 | DS     | 1  | <sup>1</sup> I <sub>2S</sub> -(GalN)                                                     | 1I2S_DS          | 103.67 | 103.04 | 5.21 | 5.14 |
| 36 | DS+ChS | 2  | <sup>2</sup> GalN                                                                        | 2GalN_DSChS      | 55.21  | 53.07  | 4.12 | 3.98 |
| 37 |        |    | noise                                                                                    | noise            | 59     | 53     | 2.0  | 1.5  |

(1) Overlapped with GalNac6S ChS

**Table S2.** HSQC Integration regions



**1 - Preliminary calculations:**

|        |                                                                                                                                                      |
|--------|------------------------------------------------------------------------------------------------------------------------------------------------------|
| A1SUM  | $v\_1ANS6X\_G + v\_1ANS3S6X + v\_Atot + v\_1ANS6X\_I + v\_1ANAc6X\_I2X + v\_1ANS6X\_aRed\_X + v\_1ANAc6X\_aRed + v\_1ANS6X\_GalA\_Unk + v\_1epoxide$ |
| A2SUM  | $v\_2ANS6X + v\_2ANS3S6X + v\_2ANAc6X + v\_2ANH26X$                                                                                                  |
| A6SUM  | $v\_6ANY3X + v\_6ANY3X6S$                                                                                                                            |
| USUM   | $v\_I2Stot + v\_I12S\_ANH26X + v\_I1\_ANY6S + v\_I1\_ANY + v\_1GX + v\_1G\_ANS3S6X + v\_1G\_ANS6X + v\_1G\_ANAc6X + v\_1epoxide$                     |
| GAGSUM | $A2SUM + v\_2GalN\_DSChS$                                                                                                                            |
| DCSUM  | $v\_1G\_ChS4S + v\_1G\_ChS6S + v\_1I\_DS + v\_1I2S\_DS$                                                                                              |

**2 - Percent composition expressed in glycosaminoglycans components:**

|     |                                                                                                       |
|-----|-------------------------------------------------------------------------------------------------------|
| Hep | $100 * A2SUM / GAGSUM$                                                                                |
| DS  | $IF [ DCSUM > 0 ] 100 * (v\_2GalN\_DSChS / GAGSUM) * (v\_1I\_DS + v\_1I2S\_DS) / DCSUM$<br>ELSE 0     |
| ChS | $IF [ DCSUM > 0 ] 100 * (v\_2GalN\_DSChS / GAGSUM) * (v\_1G\_ChS4S + v\_1G\_ChS6S) / DCSUM$<br>ELSE 0 |

**3 - Internal composition of glucosamines in heparin and heparan sulfate, expressed in percent:**

|                          |                                                                                                         |
|--------------------------|---------------------------------------------------------------------------------------------------------|
| $A_{NAc,6x}-(G)$         | $v\_2ANAc6X * 100 / A2SUM - (v\_1ANAc6X\_I2X + v\_1ANAc6X\_aRed) * 100 / A1SUM$                         |
| $A_{NAc,6x}-(I)$         | $v\_1ANAc6X\_I2X * 100 / A1SUM$                                                                         |
| $A_{NS,6x}-(G)$          | $v\_1ANS6X\_G * 100 / A1SUM$                                                                            |
| $A_{NS,6x}-(I)$          | $v\_1ANS6X\_I * 100 / A1SUM$                                                                            |
| $A_{NS,6x}-(I_{2S})$     | $v\_Atot * 100 / A1SUM - v\_2ANAc6X * 100 / A2SUM + (v\_1ANAc6X\_I2X + v\_1ANAc6X\_aRed) * 100 / A1SUM$ |
| $A_{NS,6x}-(GalA) + Unk$ | $v\_1ANS6X\_GalA\_Unk * 100 / A1SUM$                                                                    |
| $A_{NS,6x}-(Epoxy)$      | $v\_1epoxide * 100 / A1SUM$                                                                             |
| $A_{NH2,6x}$             | $v\_2ANH26X * 100 / A2SUM$                                                                              |
| $A_{NAc,6x}$             | $v\_2ANAc6X * 100 / A2SUM$                                                                              |
| $A_{NS,3S,6x}$           | $v\_1ANS3S6X * 100 / A1SUM$                                                                             |
| $A_{NAc,6x} \alpha Red$  | $v\_1ANAc6X\_aRed * 100 / A1SUM$                                                                        |
| $A_{NS,6x} \alpha Red$   | $v\_1ANS6X\_aRed\_X * 100 / A1SUM - v\_2ANH26X * 100 / A2SUM$                                           |
| $A_{NS,6X}$              | $100 - A_{NH26X} - A_{NAc6X} - A_{NS3S6X}$                                                              |

**4 - Internal composition of uronic acids in heparin and heparan sulfate, expressed in percent:**

|                         |                                                                |
|-------------------------|----------------------------------------------------------------|
| $G-(A_{NAc,6x})$        | $v\_1G\_ANAc6X * 100 / USUM$                                   |
| $G-(A_{NS,6x})$         | $v\_1G\_ANS6X * 100 / USUM$                                    |
| $G-(A_{NS,3S,6x})$      | $v\_1G\_ANS3S6X * 100 / USUM$                                  |
| $I-(A_{Ny})$            | $v\_1I\_ANY * 100 / USUM$                                      |
| $I-(A_{Ny,6S})$         | $v\_1I\_ANY6S * 100 / USUM$                                    |
| $I_{2S}-(A_{NH2,6x})$   | $v\_1I2S\_ANH26X * 100 / USUM$                                 |
| $I_{2S}-(A_{Ny,3x,6x})$ | $(v\_I2Stot - v\_5GalA) * 100 / USUM$                          |
| $G_{20H}$               | $(v\_1G\_ANS6X + v\_1G\_ANAc6X + v\_1G\_ANS3S6X) * 100 / USUM$ |
| $G_{2S}$                | $v\_1GX * 100 / USUM$                                          |
| $I_{20H}$               | $(v\_1I\_ANY6S + v\_1I\_ANY) * 100 / USUM$                     |
| $I_{2S}$                | $(v\_1I2S\_ANH26X + v\_I2Stot - v\_5GalA) * 100 / USUM$        |
| GalA                    | $v\_5GalA * 100 / USUM$                                        |
| 2,3-epoxide             | $v\_1epoxide * 100 / USUM$                                     |

**5 - % 6S sulfation:**

|      |                             |
|------|-----------------------------|
| % 6S | $v\_6ANY3X6S * 100 / A6SUM$ |
|------|-----------------------------|

**Table S3.1 - Formulas for the HSQC quantification**

**6 - Evaluation of the ligand region and the percentage of oxidized serine:**

|       |                                                                                                                                                   |
|-------|---------------------------------------------------------------------------------------------------------------------------------------------------|
| LR    | $v\_2LR * 100 / (A1SUM + USUM)$                                                                                                                   |
| oxSer | IF [ $v\_1Xyl\_Ser + v\_1Xyl\_oxSer > 0$ ] $v\_1Xyl\_oxSer * 100 / (v\_1Xyl\_Ser + v\_1Xyl\_oxSer)$<br>ELSE 'Not Available: Serine not Detected!' |

**7 - Degree of sulfation:**

|       |                                                           |
|-------|-----------------------------------------------------------|
| DSulf | $(A\_6S + A\_NS6X + 2 * A\_NS3S6X + G\_2S + I\_2S) / 100$ |
|-------|-----------------------------------------------------------|

**8 - Additional Results:**

|                           |                                               |
|---------------------------|-----------------------------------------------|
| GNR                       | $(v\_3GNR + v\_4GNR) * 100 / (2 * USUM)$      |
| $A_{NAC-ox}$              | $v\_2ANAc\_ox * 100 / A2SUM$                  |
| $A_{NS,6X}$ from $^2A$    | $v\_2ANS6X / A2SUM * 100$                     |
| $A_{NS,3S,6X}$ from $^2A$ | $v\_2ANS3S6X / A2SUM * 100$                   |
| $^2A_{SUM} / ^1A_{SUM}$   | $A2SUM / A1SUM$                               |
| $^1U_{SUM} / ^1A_{SUM}$   | $USUM / A1SUM$                                |
| Disacch Mass              | $336 + 23 + SDEG * 102 + A\_NAC6X * 42 / 100$ |

**9 - Sulfation distribution dermatan sulfate and of chondroitin:**

|                                    |                                                                                                                                                         |
|------------------------------------|---------------------------------------------------------------------------------------------------------------------------------------------------------|
| % 2-sulfated DS<br>(short. DS2S)   | IF [ $v\_11\_DS + v\_112S\_DS > 0$ ] $100 * v\_112S\_DS / (v\_11\_DS + v\_112S\_DS)$<br>ELSE 'Not Available: Dermatan Sulfate not Detected'             |
| % 6-sulfated ChS<br>(short. ChS6S) | IF [ $v\_1G\_ChS4S + v\_1G\_ChS6S > 0$ ] $100 * v\_1G\_ChS6S / (v\_1G\_ChS4S + v\_1G\_ChS6S)$<br>ELSE 'Not Available: Chondroitin Sulfate not Detected' |

**Table S3.2 - Formulas for the HSQC quantification**

## Design scheme

| Factor         | Weight | Buffer pH | Temp. | Phase <sup>(1)</sup> | DM1 | DM2 | DM3 |
|----------------|--------|-----------|-------|----------------------|-----|-----|-----|
| Low level (-1) | 18 mg  | 7.0       | 296 K | PCH0-5°              | NA  | NA  | NA  |
| High level (1) | 22 mg  | 7.2       | 300 K | PCH0+5°              | NA  | NA  | NA  |
| EXP 1          | 1      | 1         | 1     | 1                    | 1   | 1   | 1   |
| EXP 2          | 1      | 1         | -1    | 1                    | -1  | -1  | -1  |
| EXP 3          | 1      | -1        | 1     | -1                   | 1   | -1  | -1  |
| EXP 4          | 1      | -1        | -1    | -1                   | -1  | 1   | 1   |
| EXP 5          | -1     | 1         | 1     | -1                   | -1  | 1   | -1  |
| EXP 6          | -1     | 1         | -1    | -1                   | 1   | -1  | 1   |
| EXP 7          | -1     | -1        | 1     | 1                    | -1  | -1  | 1   |
| EXP 8          | -1     | -1        | -1    | 1                    | 1   | 1   | -1  |

## Effects formulas

$$E_{ij} = \frac{1}{4} \cdot \sum_{k=1}^8 lv_{ki} \cdot r_{kj} \qquad E_{lim,j} = \pm \sqrt{\frac{\sum_{i=5}^7 E_{ij}^2}{3}}$$

$E_{ij}$  is the effect of factor i on fragment j

$lv_{kj}$  is the value (1 or -1) of the level for the factor j in the experiment k

$r_{kj}$  is the value of the fragment j in the experiment k

$E_{lim,j}$  are the limits outside which an effect on fragment j is considered significant

**Table S4** - Plackett-Burman design for the HSQC robustness study and formulas for the computation of the effects of factors.

<sup>(1)</sup>  $\pm 5^\circ$  in PCH0 is referred to the optimal value found by the operator.

|     | A_NAc6X_G | A_NAc6X_I | A_NS6X_G | A_NS6X_I | A_NS6X_I_2S | A_NS6X_GalA | A_NS6X_Epox | A_NH26X | A_NAc6X | A_NS3S6X | A_NAc6XaRed | A_NS6XaRed | A_NS6X | A_6S |
|-----|-----------|-----------|----------|----------|-------------|-------------|-------------|---------|---------|----------|-------------|------------|--------|------|
| PB1 | 14.2      | 0.8       | 9.2      | 9.8      | 58.2        | 0.0         | 0.0         | 1.8     | 16.1    | 4.6      | 1.1         | 0.2        | 77.4   | 75.2 |
| PB2 | 14.4      | 0.6       | 9.7      | 8.8      | 59.0        | 0.0         | 0.0         | 2.0     | 16.1    | 4.6      | 1.1         | -0.1       | 77.3   | 74.7 |
| PB3 | 13.1      | 1.0       | 10.5     | 9.4      | 57.2        | 1.1         | 0.0         | 1.9     | 15.3    | 4.8      | 1.2         | -0.1       | 78.1   | 73.4 |
| PB4 | 13.7      | 0.9       | 10.4     | 8.4      | 57.0        | 2.1         | 0.0         | 2.0     | 15.8    | 4.1      | 1.1         | 0.3        | 78.2   | 74.2 |
| PB5 | 13.1      | 0.8       | 10.4     | 8.6      | 58.2        | 1.7         | 0.0         | 2.0     | 14.8    | 4.1      | 1.0         | 0.2        | 79.1   | 74.6 |
| PB6 | 14.1      | 0.6       | 8.9      | 9.0      | 60.0        | 0.0         | 0.0         | 2.0     | 15.4    | 4.4      | 0.8         | 0.2        | 78.1   | 74.7 |
| PB7 | 15.1      | 0.4       | 9.2      | 8.7      | 58.9        | 0.0         | 0.7         | 2.0     | 16.2    | 4.4      | 0.7         | -0.1       | 77.4   | 75.8 |
| PB8 | 13.7      | 0.7       | 9.8      | 8.8      | 59.3        | 0.0         | 0.0         | 2.0     | 15.4    | 4.9      | 1.0         | -0.2       | 77.7   | 74.7 |

|     | G_A_NAc6X | G_A_NS6X | G_A_NS3S6X | I_A_NY | I_A_NY6S | I_2S_A_NH26X | I_2S_A_NY3X6X | G_2OH | G_2S | I_2OH | I_2S | GalA | Epox |
|-----|-----------|----------|------------|--------|----------|--------------|---------------|-------|------|-------|------|------|------|
| PB1 | 6.9       | 6.8      | 3.6        | 3.7    | 7.4      | 2.2          | 69.4          | 17.3  | 0.0  | 11.0  | 71.6 | 0.0  | 0.0  |
| PB2 | 7.2       | 7.4      | 3.4        | 4.0    | 7.7      | 2.7          | 67.7          | 18.0  | 0.0  | 11.7  | 70.3 | 0.0  | 0.0  |
| PB3 | 6.9       | 7.2      | 3.9        | 3.3    | 7.8      | 2.4          | 68.6          | 18.0  | 0.0  | 11.0  | 71.0 | 0.0  | 0.0  |
| PB4 | 6.8       | 7.9      | 3.6        | 3.6    | 7.5      | 2.5          | 68.0          | 18.3  | 0.0  | 11.1  | 70.6 | 0.0  | 0.0  |
| PB5 | 7.0       | 6.8      | 3.1        | 3.1    | 7.8      | 1.9          | 70.4          | 16.8  | 0.0  | 10.9  | 72.2 | 0.0  | 0.0  |
| PB6 | 6.8       | 7.2      | 3.8        | 3.2    | 7.1      | 2.2          | 69.7          | 17.8  | 0.0  | 10.2  | 71.9 | 0.0  | 0.0  |
| PB7 | 6.2       | 8.3      | 3.1        | 2.8    | 7.2      | 2.4          | 69.3          | 17.6  | 0.0  | 10.0  | 71.7 | 0.0  | 0.7  |
| PB8 | 6.9       | 6.9      | 3.2        | 3.1    | 7.0      | 2.4          | 70.5          | 17.0  | 0.0  | 10.1  | 72.8 | 0.0  | 0.0  |

|     | Hep  | DS  | ChS | DS2S | ChS6S |     | LR  | GNR | oxA_NAc | oxSer | SDEG | MDIS |
|-----|------|-----|-----|------|-------|-----|-----|-----|---------|-------|------|------|
| PB1 | 89.5 | 8.4 | 2.0 | 11.2 | 9.7   | PB1 | 6.1 | 2.5 | 0.0     | 8.8   | 2.33 | 604  |
| PB2 | 89.9 | 8.0 | 2.1 | 13.7 | 17.8  | PB2 | 6.1 | 2.6 | 0.0     | 4.2   | 2.32 | 602  |
| PB3 | 90.0 | 8.2 | 1.8 | 10.4 | 14.7  | PB3 | 5.8 | 1.9 | 0.0     | 5.6   | 2.32 | 602  |
| PB4 | 91.1 | 7.8 | 1.1 | 13.4 | 0.0   | PB4 | 6.5 | 2.2 | 0.0     | 0.0   | 2.31 | 601  |
| PB5 | 90.1 | 8.6 | 1.3 | 11.0 | 0.0   | PB5 | 5.7 | 1.7 | 0.0     | 10.8  | 2.34 | 604  |
| PB6 | 90.9 | 7.6 | 1.5 | 10.8 | 16.9  | PB6 | 6.1 | 1.8 | 0.0     | 0.0   | 2.34 | 604  |
| PB7 | 89.4 | 8.6 | 2.0 | 5.5  | 8.3   | PB7 | 5.9 | 2.0 | 0.0     | 2.9   | 2.34 | 604  |
| PB8 | 90.7 | 7.8 | 1.5 | 11.6 | 0.0   | PB8 | 6.3 | 3.3 | 0.0     | 3.0   | 2.35 | 605  |

**Table S5** – Results of the HSQC quantification for the Plackett-Burman design experiments done to evaluate the method robustness

|             | Hep   | DS    | ChS   |
|-------------|-------|-------|-------|
| Weight      | -0.14 | -0.06 | 0.19  |
| Buffer pH   | -0.2  | 0.06  | 0.14  |
| Temperature | -0.91 | 0.65  | 0.26  |
| Phase       | -0.64 | 0.19  | 0.45  |
| DM1         | 0.15  | -0.25 | 0.1   |
| DM2         | 0.28  | 0.07  | -0.34 |
| DM3         | 0.08  | -0.05 | -0.03 |

|             | A <sub>NH2,6x</sub> | A <sub>NAC,6x</sub> (G) | A <sub>NAC,6x</sub> (I) | A <sub>NS,6x</sub> (G) | A <sub>NS,6x</sub> (I) | A <sub>NS,6x</sub> (I2S) |
|-------------|---------------------|-------------------------|-------------------------|------------------------|------------------------|--------------------------|
| Weight      | -0.11               | -0.14                   | 0.22                    | 0.38                   | 0.31                   | -1.24                    |
| Buffer pH   | -0.01               | 0.03                    | -0.06                   | -0.45                  | 0.22                   | 0.72                     |
| Temperature | -0.06               | -0.09                   | 0.07                    | 0.13                   | 0.39                   | -0.69                    |
| Phase       | -0.01               | 0.86                    | -0.21                   | -0.6                   | 0.14                   | 0.76                     |
| DM1         | -0.04               | -0.27                   | 0.07                    | -0.31                  | 0.64                   | 0.4                      |
| DM2         | -0.03               | -0.5                    | 0.17                    | 0.36                   | -0.07                  | -0.6                     |
| DM3         | -0.01               | 0.7                     | -0.07                   | -0.62                  | 0.09                   | 0.11                     |

|             | A <sub>NS,6x</sub> (GalA)+Unk | A <sub>NS,3S,6x</sub> | A <sub>NAC,6x</sub> αRed | A <sub>NS,6x</sub> αRed |
|-------------|-------------------------------|-----------------------|--------------------------|-------------------------|
| Weight      | 0.36                          | 0.07                  | 0.28                     | 0.05                    |
| Buffer pH   | -0.36                         | -0.12                 | 0                        | 0.17                    |
| Temperature | 0.16                          | -0.03                 | -0.02                    | -0.01                   |
| Phase       | -1.2                          | 0.3                   | -0.03                    | -0.18                   |
| DM1         | -0.68                         | 0.36                  | 0.04                     | -0.05                   |
| DM2         | 0.68                          | -0.13                 | 0.12                     | 0.17                    |
| DM3         | -0.16                         | -0.21                 | -0.15                    | 0.16                    |

|             | G-(A <sub>NAC,6x</sub> ) | G-(A <sub>NS,6x</sub> ) | G-(A <sub>NS,3S,6x</sub> ) |
|-------------|--------------------------|-------------------------|----------------------------|
| Weight      | 0.23                     | 0.01                    | 0.33                       |
| Buffer pH   | 0.26                     | -0.52                   | 0.02                       |
| Temperature | -0.19                    | -0.06                   | -0.08                      |
| Phase       | -0.06                    | 0.07                    | -0.27                      |
| DM1         | 0.12                     | -0.57                   | 0.31                       |
| DM2         | 0.16                     | -0.44                   | -0.19                      |
| DM3         | -0.3                     | 0.49                    | 0.13                       |

|             | I-(ANy') | I-(ANy',6S) | I2S-(ANH2,6x) | I2S-(ANy',3x,6x) | 2,3-epoxide |
|-------------|----------|-------------|---------------|------------------|-------------|
| Weight      | 0.58     | 0.3         | 0.23          | -1.52            | -0.17       |
| Buffer pH   | 0.3      | 0.11        | -0.19         | 0.2              | -0.17       |
| Temperature | -0.26    | 0.19        | -0.22         | 0.45             | 0.17        |
| Phase       | 0.1      | -0.2        | 0.19          | 0.01             | 0.17        |
| DM1         | -0.08    | -0.25       | -0.09         | 0.73             | -0.17       |
| DM2         | 0.09     | -0.03       | -0.16         | 0.73             | -0.17       |
| DM3         | -0.07    | -0.28       | 0.03          | -0.17            | 0.17        |

|             | LR    | DSulf  | % 6S  | G <sub>NR</sub> | A <sub>NS,6x</sub> from <sup>2</sup> A | A <sub>NS,3S,6x</sub> from <sup>2</sup> A | Disacch Mass |
|-------------|-------|--------|-------|-----------------|----------------------------------------|-------------------------------------------|--------------|
| Weight      | 0.13  | -0.02  | -0.55 | 0.09            | -0.66                                  | 0.42                                      | -1.91        |
| Buffer pH   | -0.1  | 0.002  | 0.29  | -0.19           | 0.22                                   | -0.19                                     | 0.21         |
| Temperature | -0.39 | 0.005  | 0.17  | -0.42           | -0.57                                  | 0.68                                      | 0.47         |
| Phase       | 0.11  | 0.007  | 0.86  | 0.74            | -0.27                                  | -0.35                                     | 1.02         |
| DM1         | 0.05  | 0.009  | -0.34 | 0.25            | 0.34                                   | -0.14                                     | 0.8          |
| DM2         | 0.16  | 0.007  | 0.06  | 0.36            | -0.18                                  | 0.42                                      | 0.67         |
| DM3         | 0.18  | -0.002 | 0.63  | -0.21           | -0.34                                  | -0.13                                     | 0            |

**Table S6** – Plackett-Burman design - effects of factors on the HSQC quantification.

| <b>Condition 1</b>      | <b>Condition 2</b>      | <b>Condition 3</b>      | <b>Condition 4</b>      |
|-------------------------|-------------------------|-------------------------|-------------------------|
| Operator A              | Operator A              | Operator B              | Operator B              |
| Spectr. 500MHz          | Spectr. 600MHz          | Spectr. 500MHz          | Spectr. 600MHz          |
| <i>replicate (1,#1)</i> | <i>replicate (2,#1)</i> | <i>replicate (3,#1)</i> | <i>replicate (4,#1)</i> |
| <i>replicate (1,#2)</i> | <i>replicate (2,#2)</i> | <i>replicate (3,#2)</i> | <i>replicate (4,#2)</i> |
| <i>replicate (1,#3)</i> | <i>replicate (2,#3)</i> | <i>replicate (3,#3)</i> | <i>replicate (4,#3)</i> |
| <i>replicate (1,#4)</i> | <i>replicate (2,#4)</i> | <i>replicate (3,#4)</i> | <i>replicate (4,#4)</i> |

Let  $c$  be the number of conditions ( $c = 4$ ),  $m$  the number of replicates for each condition ( $r = 4$ ) and  $x_{ij}$  the value obtained in the  $j$ -th replicate of  $i$ -th condition for fragment  $x$ . Define

$$\bar{x}_i = \frac{1}{m} \cdot \sum_{j=1}^m x_{ij}$$

$$\bar{x} = \frac{1}{cm} \sum_{i=1}^c \sum_{j=1}^m x_{ij}$$

$$s_1^2 = \frac{m}{c-1} \cdot \sum_{j=1}^c (\bar{x}_i - \bar{x})^2$$

$$s_2^2 = \frac{1}{c(m-1)} \cdot \sum_{i=1}^c \sum_{j=1}^m (x_{ij} - \bar{x}_i)^2$$

The p-value of  $s_1^2/s_2^2$  for the  $F$ -distribution with  $c-1$  degrees of freedom at the numerator and  $m-1$  degrees of freedom at the denominator was computed. Significance of conditions on fragment  $x$  evaluation was set at 5%.

**Table S7** – Intermediate precision: experiments design (four conditions; four replicates for each condition) and formulae for assess significance of conditions.

|                         | A_NAc6X_G | A_NAc6X_I | A_NS6X_G | A_NS6X_I | A_NS6X_I_2S | A_NS6X_GalA | A_NS6X_Epox | A_NH26X | A_NAc6X | A_NS3S6X | A_NAc6XaRed | A_NS6XaRed | A_NS6X | A_6S |
|-------------------------|-----------|-----------|----------|----------|-------------|-------------|-------------|---------|---------|----------|-------------|------------|--------|------|
| <i>replicate (1,#1)</i> | 14.4      | 1.0       | 9.0      | 9.1      | 58.2        | 0.0         | 0.4         | 2.2     | 16.6    | 4.7      | 1.3         | -0.1       | 76.5   | 73.2 |
| <i>replicate (1,#2)</i> | 13.8      | 0.9       | 10.4     | 9.1      | 58.2        | 0.0         | 0.0         | 2.2     | 15.8    | 4.7      | 1.2         | -0.4       | 77.3   | 73.5 |
| <i>replicate (1,#3)</i> | 13.6      | 0.9       | 9.3      | 10.5     | 57.8        | 0.0         | 0.0         | 2.1     | 15.5    | 4.7      | 1.0         | 0.1        | 77.7   | 73.4 |
| <i>replicate (1,#4)</i> | 15.1      | 0.8       | 9.9      | 10.4     | 54.7        | 0.9         | 0.0         | 2.4     | 16.8    | 4.9      | 0.9         | -0.1       | 76.0   | 73.2 |
| <i>replicate (2,#1)</i> | 14.6      | 0.7       | 9.4      | 9.1      | 58.0        | 0.0         | 0.0         | 2.3     | 16.4    | 5.4      | 1.2         | -0.5       | 75.9   | 75.2 |
| <i>replicate (2,#2)</i> | 14.2      | 0.8       | 9.4      | 9.3      | 59.3        | 0.0         | 0.0         | 1.3     | 15.6    | 4.7      | 0.6         | 0.4        | 78.3   | 74.7 |
| <i>replicate (2,#3)</i> | 14.4      | 0.8       | 10.3     | 9.3      | 57.8        | 0.0         | 0.0         | 2.1     | 16.1    | 4.7      | 0.9         | -0.3       | 77.2   | 74.7 |
| <i>replicate (2,#4)</i> | 13.7      | 0.6       | 9.3      | 8.2      | 59.8        | 0.0         | 0.0         | 1.8     | 15.6    | 5.2      | 1.3         | 0.1        | 77.3   | 74.8 |
| <i>replicate (3,#1)</i> | 14.9      | 0.6       | 9.5      | 9.3      | 57.3        | 0.8         | 0.4         | 1.9     | 16.6    | 4.1      | 1.0         | 0.1        | 77.4   | 73.2 |
| <i>replicate (3,#2)</i> | 15.0      | 0.6       | 10.3     | 8.6      | 57.5        | 0.8         | 0.0         | 2.1     | 16.5    | 4.5      | 0.9         | -0.2       | 77.0   | 73.3 |
| <i>replicate (3,#3)</i> | 14.6      | 0.7       | 9.7      | 9.3      | 56.5        | 2.3         | 0.0         | 2.2     | 16.2    | 4.0      | 0.9         | -0.2       | 77.6   | 72.8 |
| <i>replicate (3,#4)</i> | 14.6      | 1.0       | 9.7      | 8.5      | 58.1        | 1.0         | 0.0         | 2.0     | 16.4    | 4.1      | 0.8         | 0.2        | 77.5   | 73.8 |
| <i>replicate (4,#1)</i> | 14.3      | 0.8       | 9.0      | 9.4      | 58.9        | 1.1         | 0.0         | 2.0     | 16.1    | 3.7      | 0.9         | -0.2       | 78.3   | 74.6 |
| <i>replicate (4,#2)</i> | 13.5      | 0.7       | 9.4      | 9.2      | 59.5        | 0.0         | 0.0         | 2.3     | 15.3    | 4.6      | 1.1         | -0.3       | 77.8   | 74.9 |
| <i>replicate (4,#3)</i> | 14.9      | 0.6       | 9.7      | 8.9      | 58.7        | 0.0         | 0.0         | 2.5     | 16.1    | 4.2      | 0.7         | -0.2       | 77.2   | 74.3 |
| <i>replicate (4,#4)</i> | 14.2      | 0.9       | 9.3      | 9.5      | 59.2        | 0.0         | 0.0         | 1.5     | 15.7    | 4.0      | 0.7         | 0.7        | 78.7   | 75.4 |

|                         | G_A_NAc6X | G_A_NS6X | G_A_NS3S6X | I_A_NY | I_A_NY6S | I_2S_A_NH26X | I_2S_A_NY3X6X | G_2OH | G_2S | I_2OH | I_2S | GalA | Epox |
|-------------------------|-----------|----------|------------|--------|----------|--------------|---------------|-------|------|-------|------|------|------|
| <i>replicate (1,#1)</i> | 6.7       | 6.9      | 3.0        | 3.6    | 7.2      | 2.2          | 69.8          | 16.6  | 0.0  | 10.9  | 72.0 | 0.3  | 0.4  |
| <i>replicate (1,#2)</i> | 6.5       | 7.4      | 3.6        | 3.8    | 7.8      | 2.7          | 68.3          | 17.4  | 0.0  | 11.6  | 71.0 | 0.0  | 0.0  |
| <i>replicate (1,#3)</i> | 6.8       | 7.7      | 4.0        | 3.5    | 7.2      | 2.7          | 68.1          | 18.5  | 0.0  | 10.6  | 70.8 | 0.0  | 0.0  |
| <i>replicate (1,#4)</i> | 6.6       | 6.9      | 3.9        | 3.6    | 7.4      | 2.7          | 68.9          | 17.4  | 0.0  | 11.0  | 71.6 | 0.0  | 0.0  |
| <i>replicate (2,#1)</i> | 6.9       | 7.4      | 3.4        | 3.1    | 8.0      | 2.1          | 69.2          | 17.6  | 0.0  | 11.1  | 71.3 | 0.0  | 0.0  |
| <i>replicate (2,#2)</i> | 7.1       | 7.6      | 3.4        | 2.9    | 8.2      | 2.0          | 68.8          | 18.1  | 0.0  | 11.1  | 70.8 | 0.0  | 0.0  |
| <i>replicate (2,#3)</i> | 6.7       | 7.1      | 3.7        | 3.3    | 8.1      | 2.3          | 68.8          | 17.6  | 0.0  | 11.4  | 71.1 | 0.0  | 0.0  |
| <i>replicate (2,#4)</i> | 7.7       | 8.3      | 2.9        | 3.5    | 7.4      | 2.3          | 67.9          | 18.9  | 0.0  | 11.0  | 70.2 | 0.0  | 0.0  |
| <i>replicate (3,#1)</i> | 6.0       | 7.1      | 3.3        | 4.2    | 6.9      | 2.2          | 69.9          | 16.4  | 0.0  | 11.1  | 72.2 | 0.0  | 0.4  |
| <i>replicate (3,#2)</i> | 6.6       | 6.7      | 3.4        | 4.1    | 7.7      | 1.9          | 69.6          | 16.7  | 0.0  | 11.8  | 71.5 | 0.0  | 0.0  |
| <i>replicate (3,#3)</i> | 6.5       | 7.2      | 3.2        | 3.8    | 7.5      | 2.3          | 69.6          | 16.8  | 0.0  | 11.3  | 71.9 | 0.0  | 0.0  |
| <i>replicate (3,#4)</i> | 6.5       | 7.0      | 3.0        | 3.4    | 7.5      | 2.1          | 70.5          | 16.4  | 0.0  | 10.9  | 72.7 | 0.0  | 0.0  |
| <i>replicate (4,#1)</i> | 6.8       | 6.6      | 3.7        | 4.3    | 7.9      | 2.2          | 68.5          | 17.1  | 0.0  | 12.2  | 70.7 | 0.0  | 0.0  |
| <i>replicate (4,#2)</i> | 6.5       | 7.2      | 3.5        | 4.1    | 7.7      | 2.2          | 68.9          | 17.2  | 0.0  | 11.7  | 71.1 | 0.0  | 0.0  |
| <i>replicate (4,#3)</i> | 7.3       | 8.2      | 3.2        | 3.5    | 7.5      | 2.0          | 68.3          | 18.7  | 0.0  | 11.0  | 70.3 | 0.0  | 0.0  |
| <i>replicate (4,#4)</i> | 7.0       | 6.3      | 3.5        | 3.4    | 7.9      | 2.3          | 69.6          | 16.8  | 0.0  | 11.3  | 72.0 | 0.0  | 0.0  |

**Table S8.1** – Results of the HSQC quantification for the intermediate precision experiments

|                         | LR  | GNR | oxA_NAc | oxSer | SDEG | MDIS |                         | Hep  | DS  | ChS | DS2S | ChS6S |
|-------------------------|-----|-----|---------|-------|------|------|-------------------------|------|-----|-----|------|-------|
| <i>replicate (1,#1)</i> | 6.0 | 2.1 | 0.0     | 10.6  | 2.31 | 602  | <i>replicate (1,#1)</i> | 87.8 | 9.7 | 2.5 | 13.0 | 27.0  |
| <i>replicate (1,#2)</i> | 6.0 | 2.3 | 0.0     | 6.0   | 2.31 | 601  | <i>replicate (1,#2)</i> | 88.7 | 9.1 | 2.2 | 15.5 | 32.9  |
| <i>replicate (1,#3)</i> | 6.4 | 2.2 | 0.0     | 4.2   | 2.31 | 601  | <i>replicate (1,#3)</i> | 89.7 | 8.4 | 1.9 | 12.8 | 36.3  |
| <i>replicate (1,#4)</i> | 6.1 | 2.5 | 0.0     | 10.2  | 2.31 | 601  | <i>replicate (1,#4)</i> | 89.5 | 8.4 | 2.1 | 12.0 | 14.2  |
| <i>replicate (2,#1)</i> | 6.0 | 2.7 | 0.0     | 7.9   | 2.33 | 604  | <i>replicate (2,#1)</i> | 90.5 | 7.5 | 2.0 | 11.3 | 24.6  |
| <i>replicate (2,#2)</i> | 5.9 | 2.0 | 0.0     | 10.7  | 2.33 | 603  | <i>replicate (2,#2)</i> | 89.2 | 8.5 | 2.3 | 13.0 | 15.0  |
| <i>replicate (2,#3)</i> | 6.5 | 2.1 | 0.0     | 2.1   | 2.32 | 603  | <i>replicate (2,#3)</i> | 90.7 | 7.6 | 1.7 | 11.7 | 21.7  |
| <i>replicate (2,#4)</i> | 6.1 | 2.7 | 0.0     | 3.6   | 2.33 | 603  | <i>replicate (2,#4)</i> | 90.3 | 7.9 | 1.8 | 14.7 | 0.0   |
| <i>replicate (3,#1)</i> | 5.7 | 2.2 | 0.0     | 2.6   | 2.31 | 601  | <i>replicate (3,#1)</i> | 90.3 | 7.9 | 1.8 | 8.5  | 8.9   |
| <i>replicate (3,#2)</i> | 5.7 | 1.8 | 0.0     | 11.9  | 2.31 | 601  | <i>replicate (3,#2)</i> | 89.4 | 8.7 | 1.9 | 13.8 | 24.5  |
| <i>replicate (3,#3)</i> | 5.9 | 2.4 | 0.0     | 9.0   | 2.30 | 601  | <i>replicate (3,#3)</i> | 90.2 | 8.4 | 1.4 | 15.0 | 0.0   |
| <i>replicate (3,#4)</i> | 6.0 | 2.3 | 0.0     | 7.5   | 2.32 | 602  | <i>replicate (3,#4)</i> | 90.2 | 7.8 | 2.0 | 12.7 | 15.0  |
| <i>replicate (4,#1)</i> | 5.9 | 2.2 | 0.0     | 4.5   | 2.31 | 601  | <i>replicate (4,#1)</i> | 91.3 | 7.3 | 1.4 | 15.5 | 0.0   |
| <i>replicate (4,#2)</i> | 6.1 | 2.6 | 0.0     | 7.7   | 2.33 | 603  | <i>replicate (4,#2)</i> | 89.7 | 8.3 | 2.0 | 11.0 | 17.8  |
| <i>replicate (4,#3)</i> | 5.8 | 2.3 | 0.0     | 7.0   | 2.30 | 601  | <i>replicate (4,#3)</i> | 90.2 | 7.9 | 1.9 | 11.4 | 11.1  |
| <i>replicate (4,#4)</i> | 5.9 | 1.9 | 0.0     | 8.7   | 2.34 | 604  | <i>replicate (4,#4)</i> | 90.3 | 8.1 | 1.7 | 13.3 | 16.9  |

**Table S8.2** – Results of the HSQC quantification for the intermediate precision experiments



|      | A <sub>NH2,6x</sub> | A <sub>NAC,6x</sub> | A <sub>NS,6x</sub> | A <sub>NS,3S,6x</sub> |
|------|---------------------|---------------------|--------------------|-----------------------|
| Mean | 2.06                | 16.09               | 77.34              | 4.5                   |
| Pr>F | 0.55                | 0.23                | 0.22               | 0.00                  |
| CV   | 14.35               | 2.76                | 1.01               | 10.9                  |

|      | Hep   | DS   | ChS   |
|------|-------|------|-------|
| Mean | 89.87 | 8.21 | 1.92  |
| Pr>F | 0.05  | 0.05 | 0.13  |
| CV   | 0.98  | 7.91 | 15.47 |

|      | A <sub>NH2,6x</sub> | A <sub>NAC,6x</sub> -(G) | A <sub>NAC,6x</sub> -(I) | A <sub>NS,6x</sub> -(G) | A <sub>NS,6x</sub> -(I) | A <sub>NS,6x</sub> -(I2S) | A <sub>NS,3S,6x</sub> | A <sub>NAC,6x</sub> αRed | A <sub>NS,6x</sub> αRed |
|------|---------------------|--------------------------|--------------------------|-------------------------|-------------------------|---------------------------|-----------------------|--------------------------|-------------------------|
| Mean | 2.06                | 14.36                    | 0.77                     | 9.6                     | 9.25                    | 58.08                     | 4.5                   | 0.96                     | -0.07                   |
| Pr>F | 0.55                | 0.33                     | 0.2                      | 0.59                    | 0.15                    | 0.06                      | 0.00                  | 0.48                     | 0.94                    |
| CV   | 14.35               | 3.55                     | 16.72                    | 4.58                    | 6.47                    | 2.14                      | 10.9                  | 23.02                    | -473.57                 |

|      | G <sub>20H</sub> | I <sub>20H</sub> | I <sub>2S</sub> |
|------|------------------|------------------|-----------------|
| Mean | 17.38            | 11.24            | 71.31           |
| Pr>F | 0.06             | 0.34             | 0.04            |
| CV   | 4.65             | 3.67             | 1.02            |

|      | G-(A <sub>NAC,6x</sub> ) | G-(A <sub>NS,6x</sub> ) | G-(A <sub>NS,3S,6x</sub> ) | I-(A <sub>Ny'</sub> ) | I-(A <sub>Ny',6S</sub> ) | I2S-(A <sub>NH2,6x</sub> ) | I2S-(A <sub>Ny',3x,6x</sub> ) |
|------|--------------------------|-------------------------|----------------------------|-----------------------|--------------------------|----------------------------|-------------------------------|
| Mean | 6.76                     | 7.22                    | 3.41                       | 3.63                  | 7.61                     | 2.26                       | 69.05                         |
| Pr>F | 0.03                     | 0.43                    | 0.34                       | 0.06                  | 0.07                     | 0.02                       | 0.04                          |
| CV   | 6.01                     | 7.53                    | 9.26                       | 10.91                 | 4.76                     | 11.53                      | 1.12                          |

|      | LR   | % 6S  | G <sub>NR</sub> | A <sub>NS,6x</sub><br>from <sup>2</sup> A | A <sub>NS,3S,6x</sub><br>from <sup>2</sup> A |
|------|------|-------|-----------------|-------------------------------------------|----------------------------------------------|
| Mean | 6.00 | 74.03 | 2.26            | 76.39                                     | 5.46                                         |
| Pr>F | 0.11 | 0.00  | 0.71            | 0.47                                      | 0.43                                         |
| CV   | 3.57 | 1.3   | 11.93           | 1.05                                      | 7.87                                         |

**Table S9** – Results of the intermediate precision study for the HSQC quantification. Pr>F is the obtained p-value and CV is the computed coefficient of variation.

| Group | Sample  | ANAc6X-G | ANAc6X-I | ANS6X-G | ANS6X-I | ANS6X-I2S | ANS6X-GaII | ANS6X-EpoX | ANH26X | ANAc6X | ANS3S6X | ANAc6XaRed | ANS6XaRed | A_NS6X | A-6S  |
|-------|---------|----------|----------|---------|---------|-----------|------------|------------|--------|--------|---------|------------|-----------|--------|-------|
|       | G9907   | 15.7     | 0.0      | 9.5     | 10.1    | 56.5      | 1.3        | 0.0        | 1.6    | 17.1   | 3.9     | 0.0        | 0.0       | 77.4   | 73.7  |
|       | G9908   | 17.6     | 0.0      | 10.1    | 9.8     | 56.4      | 0.0        | 0.0        | 1.1    | 18.4   | 4.1     | 0.0        | 0.0       | 76.3   | 70.5  |
|       | G9909   | 15.5     | 0.0      | 10.3    | 9.5     | 56.9      | 0.0        | 0.0        | 0.0    | 17.6   | 4.1     | 1.2        | 0.0       | 77.3   | 70.4  |
|       | G9911   | 16.4     | 0.0      | 9.4     | 9.7     | 56.8      | 0.0        | 0.0        | 1.5    | 17.9   | 4.2     | 0.0        | 0.0       | 76.4   | 69.9  |
|       | G9912   | 14.2     | 0.0      | 9.6     | 8.7     | 59.5      | 0.0        | 0.0        | 1.8    | 15.8   | 4.3     | 0.0        | 0.0       | 78.1   | 72.7  |
|       | G9913   | 15.3     | 0.0      | 11.1    | 8.9     | 57.3      | 0.0        | 0.0        | 1.8    | 16.6   | 4.3     | 0.0        | 0.0       | 77.2   | 74.4  |
|       | G9914   | 16.3     | 0.0      | 10.4    | 9.3     | 57.0      | 0.0        | 0.0        | 2.0    | 17.6   | 4.0     | 0.0        | 0.0       | 76.5   | 71.8  |
|       | G9915   | 16.1     | 0.0      | 10.8    | 9.5     | 55.2      | 1.6        | 0.0        | 1.7    | 16.7   | 4.3     | 0.0        | 0.0       | 77.3   | 73.6  |
|       | G9916   | 14.2     | 0.0      | 9.6     | 10.0    | 56.5      | 0.0        | 0.0        | 1.9    | 16.3   | 5.5     | 1.3        | 0.0       | 76.3   | 76.9  |
|       | G9917   | 13.9     | 0.0      | 9.4     | 9.2     | 58.5      | 1.5        | 0.0        | 1.8    | 15.3   | 4.5     | 0.0        | 0.0       | 78.3   | 76.2  |
|       | G9918   | 15.4     | 0.0      | 10.2    | 9.2     | 58.7      | 0.0        | 0.0        | 2.3    | 16.2   | 3.4     | 0.0        | 0.0       | 78.2   | 74.2  |
|       | G9919   | 14.6     | 0.0      | 10.1    | 9.0     | 60.6      | 0.0        | 0.0        | 2.9    | 14.6   | 3.8     | 0.0        | 0.0       | 78.7   | 74.3  |
|       | G9920   | 13.8     | 0.0      | 9.4     | 8.8     | 60.2      | 1.2        | 0.0        | 2.0    | 14.4   | 4.4     | 0.0        | 0.0       | 79.2   | 77.0  |
|       | G9921   | 15.1     | 0.0      | 8.8     | 9.1     | 59.0      | 0.0        | 0.0        | 2.1    | 16.5   | 4.7     | 0.0        | 0.0       | 76.8   | 74.5  |
|       | G9922   | 14.4     | 0.0      | 9.3     | 9.4     | 58.6      | 0.0        | 0.0        | 1.8    | 15.7   | 4.8     | 0.0        | 0.0       | 77.7   | 75.8  |
|       | G9923   | 15.6     | 0.0      | 9.6     | 9.6     | 57.0      | 0.0        | 0.0        | 1.9    | 16.9   | 4.9     | 0.0        | 0.0       | 76.3   | 74.1  |
|       | G9924   | 15.1     | 1.0      | 10.8    | 9.3     | 57.3      | 0.0        | 0.0        | 1.2    | 17.0   | 4.2     | 0.9        | 0.0       | 77.6   | 70.6  |
|       | G9925   | 13.4     | 0.0      | 9.2     | 9.3     | 59.7      | 0.0        | 0.0        | 1.8    | 15.1   | 5.1     | 0.0        | 0.0       | 78.0   | 75.7  |
|       | G9926   | 15.1     | 0.0      | 10.0    | 8.5     | 58.0      | 0.0        | 0.0        | 2.1    | 16.2   | 4.8     | 0.0        | 0.0       | 77.0   | 73.6  |
|       | G9927   | 17.6     | 0.0      | 9.9     | 9.1     | 55.7      | 0.0        | 0.0        | 1.1    | 19.2   | 4.1     | 0.0        | 0.0       | 75.6   | 69.1  |
|       | G9928   | 16.9     | 0.0      | 10.2    | 9.5     | 55.7      | 0.0        | 0.0        | 1.8    | 18.6   | 3.8     | 0.0        | 0.0       | 75.8   | 68.3  |
|       | G9929   | 16.0     | 0.0      | 10.1    | 10.5    | 56.6      | 0.0        | 0.0        | 1.9    | 17.7   | 3.7     | 1.2        | 0.0       | 76.8   | 71.0  |
|       | G9930   | 15.4     | 0.0      | 9.0     | 10.5    | 56.1      | 0.0        | 0.0        | 1.9    | 17.0   | 5.3     | 0.0        | 0.0       | 75.8   | 73.1  |
|       | G9932   | 14.7     | 0.0      | 9.8     | 10.2    | 56.5      | 1.9        | 0.0        | 1.7    | 16.1   | 3.5     | 0.0        | 0.0       | 78.8   | 75.2  |
|       | G9933   | 17.6     | 0.0      | 10.7    | 8.8     | 55.9      | 0.0        | 0.0        | 1.4    | 18.6   | 4.3     | 0.0        | 0.0       | 75.7   | 68.5  |
|       | G9934   | 12.2     | 0.9      | 10.0    | 9.3     | 59.2      | 1.3        | 0.0        | 1.7    | 14.1   | 4.3     | 1.1        | 0.0       | 79.8   | 75.3  |
|       | G9935   | 13.9     | 0.0      | 10.0    | 9.3     | 58.2      | 1.0        | 0.0        | 1.9    | 15.3   | 4.2     | 0.9        | 0.0       | 78.7   | 73.5  |
|       | G9936   | 15.5     | 0.0      | 9.2     | 10.9    | 56.3      | 0.0        | 0.0        | 2.0    | 16.6   | 4.3     | 0.0        | 0.0       | 77.1   | 73.2  |
| C     | G9937   | 18.8     | 0.0      | 10.7    | 9.8     | 51.6      | 2.2        | 0.0        | 1.3    | 20.4   | 3.1     | 1.0        | 0.0       | 75.2   | 67.6  |
|       | G9938   | 15.1     | 1.1      | 10.3    | 9.8     | 57.1      | 0.0        | 0.0        | 1.9    | 17.0   | 4.0     | 0.0        | 0.0       | 77.2   | 71.3  |
|       | G9939   | 15.1     | 1.0      | 10.1    | 8.9     | 58.4      | 0.0        | 0.0        | 2.0    | 16.9   | 3.6     | 0.0        | 0.0       | 77.5   | 71.8  |
|       | G9940   | 13.8     | 0.0      | 9.3     | 8.6     | 60.6      | 0.0        | 0.0        | 1.6    | 15.3   | 4.2     | 0.0        | 0.0       | 78.8   | 74.8  |
|       | G9941   | 14.6     | 0.0      | 9.7     | 8.8     | 59.1      | 0.0        | 0.0        | 1.6    | 16.3   | 4.0     | 0.0        | 0.0       | 78.0   | 72.9  |
|       | G9942   | 15.1     | 0.0      | 10.2    | 8.5     | 58.3      | 0.0        | 0.0        | 1.8    | 16.7   | 4.5     | 0.0        | 0.0       | 77.0   | 71.7  |
|       | G9943   | 14.1     | 0.0      | 9.8     | 10.4    | 57.6      | 0.0        | 0.0        | 2.1    | 16.2   | 3.9     | 1.5        | 0.0       | 77.9   | 69.3  |
|       | G9944   | 11.7     | 0.0      | 9.0     | 9.8     | 62.0      | 0.0        | 0.0        | 2.2    | 13.1   | 4.2     | 0.0        | 0.0       | 80.6   | 77.6  |
|       | G9945   | 12.5     | 0.0      | 9.4     | 9.0     | 59.8      | 1.1        | 0.0        | 2.1    | 14.1   | 3.9     | 0.0        | 0.0       | 79.9   | 73.7  |
|       | G9946   | 14.7     | 0.0      | 10.0    | 9.3     | 57.2      | 0.0        | 0.0        | 1.9    | 16.8   | 4.4     | 0.0        | 0.0       | 76.9   | 74.8  |
|       | G9947   | 14.1     | 0.0      | 10.2    | 9.6     | 58.3      | 0.0        | 0.0        | 2.2    | 15.6   | 3.8     | 0.0        | 0.0       | 78.5   | 72.4  |
| C     | G9948   | 19.0     | 0.0      | 10.2    | 8.1     | 56.8      | 0.0        | 0.0        | 1.8    | 20.0   | 3.2     | 0.0        | 0.0       | 75.1   | 68.5  |
|       | G9949   | 12.9     | 0.0      | 9.4     | 8.4     | 62.6      | 0.0        | 0.0        | 2.6    | 13.4   | 4.0     | 0.0        | 0.0       | 80.0   | 74.7  |
|       | G9950   | 14.8     | 0.0      | 9.7     | 9.6     | 58.1      | 0.0        | 0.0        | 2.0    | 16.0   | 4.8     | 0.0        | 0.0       | 77.3   | 74.3  |
| B     | G12131  | 11.9     | 0.0      | 9.7     | 9.0     | 61.6      | 0.0        | 0.0        | 2.3    | 12.6   | 4.9     | 0.0        | 0.0       | 80.2   | 77.7  |
|       | G12132  | 15.0     | 0.0      | 10.1    | 8.5     | 56.5      | 1.1        | 0.0        | 1.9    | 16.4   | 5.3     | 0.0        | 0.0       | 76.4   | 74.6  |
| B     | G12133  | 11.1     | 0.0      | 11.2    | 9.9     | 60.4      | 0.0        | 0.0        | 2.8    | 11.6   | 4.9     | 0.0        | 0.0       | 80.7   | 77.6  |
|       | G12134  | 14.9     | 0.0      | 10.0    | 9.7     | 57.0      | 0.0        | 0.0        | 1.8    | 16.4   | 4.8     | 0.9        | 0.0       | 77.0   | 76.3  |
| B     | G12135  | 12.3     | 0.0      | 9.7     | 7.8     | 61.4      | 0.0        | 0.0        | 2.4    | 13.2   | 5.3     | 0.0        | 0.0       | 79.1   | 79.0  |
|       | G12136  | 14.0     | 0.0      | 8.4     | 9.2     | 60.5      | 0.0        | 0.0        | 2.3    | 16.1   | 3.7     | 1.4        | 0.0       | 77.8   | 72.8  |
|       | G12137  | 14.2     | 0.0      | 9.5     | 9.5     | 55.9      | 1.7        | 0.0        | 1.9    | 15.8   | 5.3     | 0.0        | 0.0       | 77.0   | 74.1  |
|       | G12138  | 12.0     | 0.0      | 8.7     | 9.1     | 60.0      | 0.0        | 0.0        | 3.0    | 13.9   | 5.9     | 1.0        | 0.0       | 77.2   | 77.0  |
|       | G12139  | 16.1     | 0.0      | 9.2     | 8.8     | 56.6      | 1.7        | 0.0        | 1.5    | 17.7   | 4.4     | 0.0        | 0.0       | 76.4   | 70.9  |
| B     | G12141  | 13.2     | 0.0      | 8.9     | 8.1     | 62.8      | 0.0        | 0.0        | 2.1    | 13.8   | 4.1     | 0.0        | 0.0       | 80.0   | 79.8  |
| B     | G12142  | 13.5     | 0.0      | 10.2    | 8.3     | 59.5      | 0.0        | 0.0        | 2.6    | 14.5   | 5.1     | 0.0        | 0.0       | 77.8   | 78.0  |
|       | G12147  | 20.0     | 0.0      | 10.2    | 9.1     | 53.7      | 0.0        | 0.0        | 1.8    | 21.1   | 4.1     | 0.0        | 0.0       | 72.9   | 66.5  |
|       | G12149  | 14.8     | 0.0      | 10.7    | 8.6     | 57.2      | 0.0        | 0.0        | 2.0    | 16.5   | 4.5     | 0.0        | 0.0       | 77.0   | 75.0  |
|       | G12150  | 13.9     | 0.0      | 9.7     | 9.7     | 57.6      | 0.0        | 0.0        | 2.2    | 15.3   | 4.5     | 0.0        | 0.0       | 77.9   | 72.9  |
|       | G12151  | 18.3     | 0.0      | 9.2     | 10.6    | 53.1      | 0.0        | 0.0        | 1.3    | 20.1   | 4.6     | 0.0        | 0.0       | 74.1   | 67.2  |
| C     | G12152  | 17.5     | 0.0      | 10.3    | 8.8     | 57.6      | 0.0        | 0.0        | 0.0    | 18.4   | 3.7     | 0.0        | 0.0       | 76.8   | 68.4  |
| C     | G12153  | 18.5     | 0.0      | 8.9     | 9.6     | 56.1      | 0.0        | 0.0        | 1.8    | 19.4   | 4.1     | 0.0        | 0.0       | 74.7   | 67.3  |
| C     | G12154  | 18.6     | 0.0      | 11.0    | 7.6     | 57.0      | 0.0        | 0.0        | 0.0    | 19.3   | 3.9     | 0.0        | 0.0       | 76.8   | 69.4  |
|       | G12155  | 16.8     | 0.0      | 9.2     | 9.6     | 55.8      | 0.0        | 0.0        | 2.2    | 18.7   | 4.6     | 0.0        | 0.0       | 74.5   | 69.9  |
|       | G12156  | 19.9     | 0.0      | 10.7    | 9.3     | 55.2      | 0.0        | 0.0        | 0.0    | 19.9   | 3.9     | 0.0        | 0.0       | 76.1   | 63.3  |
|       | G12158  | 14.8     | 0.0      | 9.8     | 9.5     | 56.8      | 0.0        | 0.0        | 1.5    | 16.5   | 5.5     | 0.0        | 0.0       | 76.5   | 73.2  |
|       | G12161  | 11.8     | 0.0      | 10.0    | 8.5     | 60.7      | 0.0        | 0.0        | 2.6    | 12.2   | 5.9     | 0.0        | 0.0       | 79.3   | 79.2  |
| B     | G12163  | 15.0     | 1.0      | 9.8     | 8.7     | 56.6      | 0.0        | 0.0        | 2.0    | 16.9   | 5.5     | 0.0        | 0.0       | 75.5   | 74.7  |
|       | G12164  | 14.1     | 0.0      | 9.1     | 8.8     | 59.6      | 0.0        | 0.0        | 1.9    | 15.8   | 4.5     | 0.0        | 0.0       | 77.8   | 73.9  |
| A     | G12166  | 14.75    | 0        | 9.07    | 8.47    | 60.12     | 0          | 0          | 2.04   | 14.75  | 5.4     | 0          | 0         | 77.81  | 75.97 |
|       | G12169  | 13.4     | 0.0      | 9.7     | 8.8     | 57.9      | 0.0        | 0.0        | 2.0    | 15.4   | 5.2     | 0.0        | 0.0       | 77.4   | 73.7  |
| A     | G12170  | 14.47    | 0        | 10.56   | 7.97    | 59.82     | 0.96       | 0          | 0      | 14.47  | 5.13    | 0          | 1.09      | 80.4   | 75.92 |
|       | G12174  | 13.7     | 0.0      | 8.8     | 9.9     | 58.3      | 0.0        | 0.0        | 2.4    | 14.9   | 5.9     | 0.0        | 0.0       | 76.8   | 73.2  |
|       | G12175  | 14.8     | 0.0      | 9.5     | 8.6     | 57.9      | 0.0        | 0.0        | 2.2    | 16.6   | 5.2     | 0.0        | 0.0       | 76.0   | 73.1  |
|       | G12177  | 16.1     | 0.0      | 9.1     | 8.1     | 58.5      | 0.0        | 0.0        | 2.2    | 17.8   | 4.5     | 0.0        | 0.0       | 75.5   | 71.1  |
| A     | G12179  | 12.6     | 0.0      | 10.5    | 9.6     | 58.8      | 2.1        | 0.0        | 0.0    | 13.7   | 5.2     | 0.0        | 0.0       | 81.1   | 77.0  |
| A     | G12180  | 12.72    | 0.89     | 10.25   | 8.64    | 59.59     | 0.97       | 0          | 0.99   | 13.62  | 5.03    | 0          | 0.92      | 80.37  | 78.9  |
|       | G12181  | 15.42    | 0        | 9.59    | 9.22    | 58.41     | 0          | 0          | 1.45   | 15.42  | 5.4     | 0          | 0         | 77.73  | 77.74 |
|       | average | 15.0     | 0.1      | 9.8     | 9.2     | 57.9      | 0.3        | 0.0        | 1.8    | 16.3   | 4.5     | 0.2        | 0.0       | 77.4   | 73.3  |
|       | median  | 14.8     | 0.0      | 9.8     | 9.2     | 57.9      | 0.0        | 0.0        | 1.9    | 16.3   | 4.4     | 0.0        | 0.0       | 77.3   | 73.7  |
|       | st.dev. | 1.94     | 0.27     | 0.61    | 0.67    | 2.09      | 0.61       | 0.00       | 0.65   | 1.99   | 0.66    | 0.41       | 0.16      | 1.64   | 3.36  |
|       | min     | 11.1     | 0.0      | 8.4     | 7.6     | 51.6      | 0.0        | 0.0        | 0.0    | 11.6   | 3.1     | 0.0        | 0.0       | 72.9   | 63.3  |
|       | max     | 20.0     | 1.1      | 11.2    | 10.9    | 62.8      | 2.2        | 0.0        | 3.0    | 21.1   | 5.9     | 1.5        | 1.1       | 81.1   | 79.8  |

**Table S10** - Molar percentages of glucosamine residues of 75 porcine crude heparin samples.

NB: 0 value means <LOD

| Group | Sample  | G_ANAc6X | G_ANS6X | G_ANS3S6X | I_ANY | I_ANY6S | I2S_ANH26X | I2S_ANY3X6X | G2OH  | G2S  | I2OH  | I2S   |
|-------|---------|----------|---------|-----------|-------|---------|------------|-------------|-------|------|-------|-------|
|       | G9907   | 7.5      | 6.8     | 3.6       | 3.5   | 8.1     | 2.8        | 67.7        | 17.9  | 0.0  | 11.7  | 70.4  |
|       | G9908   | 10.5     | 6.2     | 3.6       | 3.5   | 6.8     | 1.4        | 68.0        | 20.2  | 0.0  | 10.4  | 69.4  |
|       | G9909   | 9.7      | 6.7     | 2.8       | 3.2   | 7.8     | 1.8        | 67.9        | 19.2  | 0.0  | 11.0  | 69.8  |
|       | G9911   | 11.0     | 7.1     | 2.8       | 3.2   | 6.9     | 1.5        | 67.5        | 20.9  | 0.0  | 10.1  | 69.1  |
|       | G9912   | 6.8      | 7.2     | 3.5       | 3.5   | 7.9     | 2.2        | 68.9        | 17.6  | 0.0  | 11.3  | 71.1  |
|       | G9913   | 6.5      | 7.3     | 3.8       | 4.1   | 7.1     | 1.8        | 69.4        | 17.6  | 0.0  | 11.2  | 71.2  |
|       | G9914   | 7.8      | 6.6     | 3.7       | 3.4   | 7.8     | 2.7        | 68.1        | 18.1  | 0.0  | 11.1  | 70.8  |
|       | G9915   | 6.9      | 7.5     | 3.0       | 3.3   | 6.9     | 2.3        | 70.1        | 17.4  | 0.0  | 10.2  | 72.4  |
|       | G9916   | 6.3      | 7.4     | 4.2       | 2.8   | 7.9     | 2.4        | 69.0        | 17.9  | 0.0  | 10.7  | 71.4  |
|       | G9917   | 5.4      | 6.9     | 3.9       | 3.4   | 7.8     | 2.2        | 70.4        | 16.1  | 0.0  | 11.2  | 72.7  |
|       | G9918   | 6.5      | 8.0     | 4.1       | 3.6   | 6.2     | 2.8        | 68.8        | 18.6  | 0.0  | 9.8   | 71.6  |
|       | G9919   | 6.5      | 7.1     | 4.2       | 2.0   | 7.9     | 2.4        | 70.0        | 17.8  | 0.0  | 9.9   | 72.4  |
|       | G9920   | 6.6      | 6.5     | 3.0       | 3.2   | 7.5     | 2.1        | 71.2        | 16.1  | 0.0  | 10.6  | 73.3  |
|       | G9921   | 6.4      | 6.7     | 3.0       | 3.1   | 7.5     | 2.1        | 71.1        | 16.2  | 0.0  | 10.6  | 73.2  |
|       | G9922   | 6.1      | 6.9     | 3.7       | 3.8   | 7.5     | 1.9        | 70.2        | 16.7  | 0.0  | 11.2  | 72.1  |
|       | G9923   | 7.4      | 6.8     | 4.1       | 3.5   | 6.4     | 2.4        | 69.5        | 18.2  | 0.0  | 9.9   | 72.0  |
|       | G9924   | 9.3      | 7.4     | 3.8       | 3.3   | 6.5     | 1.7        | 68.0        | 20.5  | 0.0  | 9.7   | 69.8  |
|       | G9925   | 6.2      | 6.5     | 4.9       | 3.3   | 7.4     | 2.3        | 69.4        | 17.6  | 0.0  | 10.8  | 71.7  |
|       | G9926   | 6.9      | 6.0     | 4.1       | 3.8   | 7.4     | 2.2        | 69.7        | 17.0  | 0.0  | 11.2  | 71.9  |
|       | G9927   | 9.6      | 7.9     | 3.3       | 3.3   | 7.1     | 2.1        | 66.7        | 20.7  | 0.0  | 10.5  | 68.8  |
|       | G9928   | 9.2      | 8.4     | 2.9       | 3.8   | 7.6     | 2.1        | 65.9        | 20.6  | 0.0  | 11.4  | 68.1  |
|       | G9929   | 8.4      | 7.8     | 3.2       | 3.4   | 7.4     | 1.9        | 67.8        | 19.4  | 0.0  | 10.8  | 69.7  |
|       | G9930   | 6.5      | 7.7     | 3.9       | 3.5   | 8.9     | 2.7        | 66.9        | 18.0  | 0.0  | 12.4  | 69.6  |
|       | G9932   | 6.5      | 6.9     | 3.7       | 3.4   | 7.9     | 2.4        | 69.2        | 17.1  | 0.0  | 11.3  | 71.6  |
|       | G9933   | 8.8      | 7.7     | 3.6       | 3.2   | 6.5     | 2.1        | 68.1        | 20.1  | 0.0  | 9.6   | 70.3  |
|       | G9934   | 6.1      | 7.7     | 2.8       | 3.2   | 8.0     | 1.4        | 70.8        | 16.6  | 0.0  | 11.2  | 72.2  |
|       | G9935   | 7.8      | 7.1     | 2.3       | 3.3   | 7.9     | 1.6        | 70.0        | 17.2  | 0.0  | 11.2  | 71.6  |
|       | G9936   | 8.2      | 6.9     | 3.1       | 3.4   | 7.4     | 2.4        | 68.6        | 18.2  | 0.0  | 10.9  | 71.0  |
|       | G9937   | 10.9     | 7.3     | 2.9       | 3.3   | 7.7     | 1.7        | 65.5        | 21.1  | 0.0  | 10.9  | 67.2  |
|       | G9938   | 8.0      | 6.9     | 3.9       | 3.6   | 7.2     | 2.1        | 68.4        | 18.8  | 0.0  | 10.8  | 70.4  |
|       | G9939   | 7.9      | 6.3     | 3.4       | 3.9   | 6.6     | 2.5        | 69.4        | 17.6  | 0.0  | 10.5  | 71.9  |
|       | G9940   | 6.6      | 7.4     | 3.8       | 3.2   | 7.7     | 2.6        | 68.7        | 17.8  | 0.0  | 10.9  | 71.3  |
|       | G9941   | 7.1      | 7.0     | 3.4       | 3.2   | 8.2     | 2.2        | 68.9        | 17.5  | 0.0  | 11.4  | 71.1  |
|       | G9942   | 6.8      | 7.9     | 3.8       | 3.9   | 6.8     | 2.1        | 68.8        | 18.5  | 0.0  | 10.7  | 70.9  |
|       | G9943   | 8.6      | 7.8     | 3.5       | 4.1   | 7.6     | 2.3        | 66.1        | 19.9  | 0.0  | 11.7  | 68.4  |
|       | G9944   | 4.4      | 7.5     | 3.2       | 2.3   | 6.8     | 2.7        | 73.2        | 15.0  | 0.0  | 9.1   | 75.9  |
|       | G9945   | 6.4      | 7.2     | 2.7       | 3.5   | 7.3     | 2.7        | 70.2        | 16.3  | 0.0  | 10.8  | 72.9  |
|       | G9946   | 6.4      | 7.6     | 3.2       | 3.6   | 7.5     | 2.0        | 69.8        | 17.2  | 0.0  | 11.0  | 71.8  |
|       | G9947   | 7.5      | 8.6     | 2.8       | 3.0   | 8.2     | 2.2        | 67.6        | 19.0  | 0.0  | 11.2  | 69.8  |
|       | G9948   | 8.3      | 8.0     | 3.3       | 3.4   | 7.2     | 2.4        | 67.4        | 19.6  | 0.0  | 10.6  | 69.8  |
|       | G9949   | 7.3      | 6.3     | 2.4       | 3.4   | 6.8     | 2.0        | 71.8        | 16.0  | 0.0  | 10.2  | 73.8  |
|       | G9950   | 5.4      | 7.1     | 3.4       | 3.2   | 7.3     | 2.7        | 70.9        | 15.9  | 0.0  | 10.5  | 73.6  |
|       | G12131  | 5.5      | 6.6     | 4.1       | 2.4   | 5.8     | 3.2        | 72.3        | 16.2  | 0.0  | 8.2   | 75.5  |
|       | G12132  | 7.1      | 6.8     | 4.0       | 3.1   | 7.0     | 2.3        | 69.7        | 17.9  | 0.0  | 10.2  | 72.0  |
|       | G12133  | 4.7      | 6.5     | 4.0       | 2.6   | 6.7     | 3.9        | 71.7        | 15.1  | 0.0  | 9.3   | 75.6  |
|       | G12134  | 7.4      | 6.1     | 4.0       | 2.5   | 5.8     | 2.6        | 71.5        | 17.6  | 0.0  | 8.3   | 74.1  |
|       | G12135  | 4.6      | 7.1     | 3.1       | 2.6   | 6.8     | 3.0        | 72.7        | 14.9  | 0.0  | 9.4   | 75.7  |
|       | G12136  | 5.9      | 7.6     | 3.4       | 3.1   | 6.5     | 2.8        | 70.7        | 16.9  | 0.0  | 9.6   | 73.5  |
|       | G12137  | 7.4      | 6.9     | 4.1       | 3.6   | 7.9     | 2.4        | 67.8        | 18.4  | 0.0  | 11.5  | 70.1  |
|       | G12138  | 5.5      | 7.3     | 4.1       | 3.2   | 7.1     | 3.0        | 69.8        | 16.9  | 0.0  | 10.3  | 72.8  |
|       | G12139  | 9.0      | 6.8     | 3.1       | 3.0   | 7.2     | 1.8        | 69.1        | 18.9  | 0.0  | 10.2  | 70.9  |
|       | G12141  | 4.2      | 8.0     | 2.6       | 2.4   | 6.0     | 3.1        | 73.7        | 14.8  | 0.0  | 8.4   | 76.8  |
|       | G12142  | 4.5      | 6.4     | 3.9       | 2.1   | 6.6     | 2.9        | 73.6        | 14.8  | 0.0  | 8.7   | 76.5  |
|       | G12147  | 10.5     | 7.9     | 3.5       | 4.0   | 8.0     | 1.9        | 64.2        | 21.9  | 0.0  | 12.0  | 66.0  |
|       | G12149  | 6.4      | 6.9     | 2.6       | 3.5   | 7.0     | 2.3        | 71.3        | 15.8  | 0.0  | 10.6  | 73.6  |
|       | G12150  | 7.8      | 6.6     | 3.7       | 3.1   | 7.3     | 2.3        | 69.1        | 18.1  | 0.0  | 10.4  | 71.4  |
|       | G12151  | 11.1     | 6.6     | 3.0       | 3.0   | 8.1     | 1.8        | 66.4        | 20.7  | 0.0  | 11.1  | 68.2  |
|       | G12152  | 10.0     | 7.3     | 2.9       | 3.4   | 7.4     | 1.6        | 66.2        | 21.8  | 0.0  | 10.4  | 67.8  |
|       | G12153  | 7.8      | 8.2     | 3.2       | 3.2   | 8.3     | 0.0        | 68.7        | 18.9  | 0.0  | 11.5  | 69.6  |
|       | G12154  | 9.8      | 6.5     | 5.8       | 3.8   | 6.9     | 1.8        | 65.6        | 22.0  | 0.0  | 10.7  | 67.3  |
|       | G12155  | 8.6      | 7.4     | 4.5       | 3.5   | 7.6     | 2.0        | 66.5        | 20.4  | 0.0  | 11.1  | 68.5  |
|       | G12156  | 11.4     | 6.9     | 4.1       | 4.5   | 7.7     | 2.2        | 63.2        | 22.4  | 0.0  | 12.2  | 65.4  |
|       | G12158  | 7.6      | 7.5     | 4.0       | 2.2   | 7.8     | 1.9        | 69.0        | 19.1  | 0.0  | 10.0  | 70.9  |
|       | G12161  | 5.1      | 6.6     | 4.0       | 2.3   | 6.3     | 2.9        | 72.9        | 15.6  | 0.0  | 8.5   | 75.8  |
|       | G12163  | 8.1      | 6.5     | 4.0       | 3.0   | 7.6     | 2.7        | 68.2        | 18.5  | 0.0  | 8.6   | 70.9  |
|       | G12164  | 6.2      | 6.7     | 3.6       | 3.2   | 7.1     | 1.6        | 71.6        | 16.5  | 0.0  | 10.3  | 73.2  |
|       | G12166  | 6.28     | 7.41    | 3.02      | 2.86  | 6.34    | 1.74       | 72.35       | 16.71 | 0    | 9.2   | 74.08 |
|       | G12169  | 6.9      | 6.9     | 4.8       | 3.8   | 7.4     | 2.3        | 67.8        | 18.6  | 0.0  | 11.3  | 70.1  |
|       | G12170  | 6.61     | 5.76    | 2.61      | 2.76  | 5.73    | ND         | 75.77       | 14.99 | 0.75 | 8.49  | 75.77 |
|       | G12174  | 7.3      | 7.5     | 3.4       | 3.1   | 7.2     | 1.9        | 69.6        | 18.2  | 0.0  | 10.3  | 71.5  |
|       | G12175  | 8.2      | 7.1     | 4.0       | 3.0   | 7.5     | 2.5        | 67.8        | 19.2  | 0.0  | 10.5  | 70.3  |
|       | G12177  | 7.3      | 8.8     | 3.4       | 3.3   | 7.6     | 2.2        | 67.4        | 19.5  | 0.0  | 10.9  | 69.6  |
|       | G12179  | 6.6      | 6.6     | 2.9       | 2.2   | 7.1     | 0.0        | 72.9        | 16.1  | 0.0  | 9.4   | 73.5  |
|       | G12180  | 5.46     | 6.04    | 2.53      | 2.64  | 6.55    | 1.46       | 75.31       | 14.04 | 0    | 9.19  | 76.78 |
|       | G12181  | 6.36     | 6.41    | 3.72      | 3.01  | 7.35    | 1.76       | 71.39       | 16.49 | 0    | 10.36 | 73.15 |
|       | average | 7.3      | 7.1     | 3.5       | 3.2   | 7.2     | 2.2        | 69.4        | 18.0  | 0.0  | 10.5  | 71.5  |
|       | median  | 7.1      | 7.1     | 3.6       | 3.3   | 7.3     | 2.2        | 69.1        | 17.9  | 0.0  | 10.6  | 71.4  |
|       | st.dev. | 1.67     | 0.63    | 0.63      | 0.50  | 0.64    | 0.59       | 2.40        | 1.92  | 0.09 | 0.92  | 2.49  |
|       | min     | 4.2      | 5.8     | 2.3       | 2.0   | 5.7     | 0.0        | 63.2        | 14.0  | 0.0  | 8.2   | 65.4  |
|       | max     | 11.4     | 8.8     | 5.8       | 4.5   | 8.9     | 3.9        | 75.8        | 22.4  | 0.8  | 12.4  | 76.8  |

**Table S11** - Molar percentages of uronic acids residues of 75 porcine crude heparin samples.

NB: 0 value means <LOD

| Group | Sample  | Hep   | DS    | ChS  | DS2S* | ChS6S* |
|-------|---------|-------|-------|------|-------|--------|
|       | G9907   | 94.3  | 4.6   | 1.0  | 0.0   | 0.0    |
|       | G9908   | 86.9  | 6.5   | 6.6  | 0.0   | 34.7   |
|       | G9909   | 85.8  | 7.1   | 7.1  | 0.0   | 40.6   |
|       | G9911   | 86.6  | 5.9   | 7.5  | 0.0   | 38.2   |
|       | G9912   | 89.9  | 7.8   | 2.3  | 12.4  | 28.8   |
|       | G9913   | 90.2  | 7.6   | 2.2  | 10.2  | 23.3   |
|       | G9914   | 88.2  | 9.2   | 2.6  | 10.5  | 27.1   |
|       | G9915   | 91.3  | 6.7   | 1.9  | 0.0   | 0.0    |
|       | G9916   | 89.3  | 8.3   | 2.4  | 0.0   | 25.8   |
|       | G9917   | 87.3  | 10.5  | 2.1  | 9.2   | 17.0   |
|       | G9918   | 92.7  | 6.6   | 0.0  | 0.0   | 0.0    |
|       | G9919   | 95.0  | 4.3   | 0.0  | 0.0   | 0.0    |
|       | G9920   | 89.3  | 8.9   | 1.9  | 10.9  | 34.4   |
|       | G9921   | 87.7  | 9.6   | 2.7  | 10.7  | 28.4   |
|       | G9922   | 88.1  | 10.0  | 1.9  | 11.1  | 40.3   |
|       | G9923   | 83.6  | 13.5  | 2.9  | 9.5   | 33.8   |
|       | G9924   | 88.6  | 6.2   | 5.2  | 0.0   | 39.1   |
|       | G9925   | 87.7  | 11.0  | 1.2  | 9.0   | 0.0    |
|       | G9926   | 90.2  | 9.0   | 0.0  | 8.1   | 0.0    |
|       | G9927   | 90.4  | 7.0   | 2.5  | 10.8  | 26.7   |
|       | G9928   | 91.3  | 6.0   | 0.0  | 0.0   | 41.8   |
|       | G9929   | 90.4  | 7.0   | 2.7  | 8.7   | 23.7   |
|       | G9930   | 89.2  | 8.7   | 2.1  | 0.0   | 0.0    |
|       | G9932   | 92.7  | 6.1   | 1.3  | 0.0   | 0.0    |
|       | G9933   | 89.2  | 7.6   | 3.2  | 0.0   | 33.3   |
|       | G9934   | 98.1  | 1.4   | 0.0  | 0.0   | 0.0    |
|       | G9935   | 98.3  | 1.7   | 0.0  | 0.0   | 0.0    |
|       | G9936   | 87.8  | 8.4   | 3.7  | 7.5   | 16.0   |
| C     | G9937   | 86.5  | 11.2  | 2.2  | 8.8   | 20.1   |
|       | G9938   | 89.6  | 7.8   | 2.6  | 13.1  | 30.3   |
|       | G9939   | 91.0  | 6.9   | 2.1  | 12.7  | 31.3   |
|       | G9940   | 87.9  | 9.7   | 2.4  | 11.7  | 22.0   |
|       | G9941   | 90.0  | 8.9   | 1.2  | 0.0   | 0.0    |
|       | G9942   | 91.0  | 7.3   | 1.6  | 7.6   | 13.4   |
|       | G9943   | 83.6  | 13.0  | 3.5  | 10.8  | 26.3   |
|       | G9944   | 88.9  | 10.5  | 0.0  | 9.1   | 0.0    |
|       | G9945   | 90.5  | 8.9   | 0.0  | 8.3   | 0.0    |
|       | G9946   | 88.8  | 8.7   | 2.5  | 11.9  | 25.6   |
|       | G9947   | 93.3  | 5.6   | 1.1  | 0.0   | 0.0    |
| C     | G9948   | 82.6  | 9.8   | 7.7  | 10.8  | 35.9   |
|       | G9949   | 91.1  | 7.4   | 1.5  | 0.0   | 0.0    |
|       | G9950   | 87.8  | 10.4  | 1.7  | 12.8  | 34.0   |
| B     | G12131  | 84.6  | 13.5  | 1.8  | 8.8   | 18.2   |
|       | G12132  | 89.5  | 8.5   | 2.0  | 13.1  | 18.7   |
| B     | G12133  | 84.7  | 13.8  | 1.5  | 9.5   | 0.0    |
|       | G12134  | 89.8  | 8.7   | 1.5  | 6.6   | 0.0    |
| B     | G12135  | 88.0  | 11.4  | 0.0  | 12.9  | 0.0    |
|       | G12136  | 88.2  | 10.2  | 1.6  | 5.6   | 19.8   |
|       | G12137  | 91.3  | 6.1   | 2.6  | 0.0   | 30.9   |
|       | G12138  | 91.7  | 7.9   | 0.0  | 11.6  | 0.0    |
|       | G12139  | 94.4  | 4.7   | 0.9  | 0.0   | 43.6   |
| B     | G12141  | 83.5  | 14.9  | 1.7  | 11.3  | 0.0    |
| B     | G12142  | 81.8  | 16.6  | 1.6  | 12.5  | 0.0    |
|       | G12147  | 85.2  | 8.7   | 6.0  | 6.1   | 41.7   |
|       | G12149  | 90.8  | 7.2   | 2.0  | 8.2   | 26.3   |
|       | G12150  | 90.5  | 8.1   | 1.4  | 10.9  | 0.0    |
|       | G12151  | 91.9  | 5.0   | 3.0  | 0.0   | 33.1   |
| C     | G12152  | 79.9  | 13.5  | 6.6  | 7.1   | 46.4   |
| C     | G12153  | 83.7  | 10.3  | 6.0  | 0.0   | 32.1   |
| C     | G12154  | 86.1  | 7.8   | 6.2  | 0.0   | 24.6   |
|       | G12155  | 89.4  | 8.3   | 2.3  | 0.0   | 0.0    |
|       | G12156  | 85.0  | 8.7   | 6.3  | 0.0   | 39.6   |
|       | G12158  | 87.2  | 9.6   | 3.2  | 9.7   | 37.5   |
|       | G12161  | 86.7  | 12.0  | 1.3  | 12.3  | 0.0    |
| B     | G12163  | 89.1  | 9.3   | 1.6  | 12.8  | 42.7   |
|       | G12164  | 89.8  | 9.4   | 0.0  | 0.0   | 0.0    |
| A     | G12166  | 98.44 | 1.56  | 0    | 0     | 0      |
|       | G12169  | 87.7  | 9.9   | 2.4  | 12.1  | 32.8   |
| A     | G12170  | 99.17 | 0     | 0    | 0     | 0      |
|       | G12174  | 87.9  | 10.0  | 2.2  | 7.5   | 49.7   |
|       | G12175  | 88.4  | 9.3   | 2.3  | 14.6  | 33.7   |
|       | G12177  | 87.2  | 9.7   | 3.2  | 11.5  | 23.6   |
| A     | G12179  | 100.0 | 0.0   | 0.0  | 0.0   | 0.0    |
| A     | G12180  | 98.67 | 0     | 0    | 0     | 0      |
|       | G12181  | 82.43 | 16.52 | 1.05 | 10.15 | 0      |
|       | average | 89.3  | 8.3   | 2.3  | 6.2   | 18.5   |
|       | median  | 89.2  | 8.7   | 2.0  | 8.1   | 22.0   |
|       | st.dev. | 4.10  | 3.38  | 1.95 | 5.32  | 16.62  |
|       | min     | 79.9  | 0.0   | 0.0  | 0.0   | 0.0    |
|       | max     | 100.0 | 16.6  | 7.7  | 14.6  | 49.7   |

**Table S12** – GAG compositions of 75 porcine crude heparin samples. DS2S\* and ChS6S\* indicate the percentage of IdoA2S and ChS6S (chondroitin C) of dermatan and chondroitin components, respectively. NB: 0 value means <LOD

| Group | Sample  | LR   | GNR  | oxANAc | oxSer | SDEG |
|-------|---------|------|------|--------|-------|------|
|       | G9907   | 5.0  | 2.4  | 0.0    | 0.0   | 2.29 |
|       | G9908   | 5.1  | 2.2  | 0.0    | 0.0   | 2.24 |
|       | G9909   | 5.4  | 3.1  | 0.0    | 0.0   | 2.26 |
|       | G9911   | 4.7  | 2.4  | 0.0    | 0.0   | 2.24 |
|       | G9912   | 6.6  | 2.3  | 0.0    | 0.0   | 2.30 |
|       | G9913   | 6.5  | 2.5  | 0.0    | 3.1   | 2.31 |
|       | G9914   | 6.8  | 2.7  | 0.0    | 5.2   | 2.27 |
|       | G9915   | 5.9  | 2.5  | 0.0    | 0.0   | 2.32 |
|       | G9916   | 5.2  | 2.6  | 0.0    | 0.0   | 2.36 |
|       | G9917   | 5.6  | 2.7  | 0.0    | 9.6   | 2.36 |
|       | G9918   | 6.2  | 2.4  | 0.0    | 0.0   | 2.31 |
|       | G9919   | 6.1  | 2.5  | 0.0    | 0.0   | 2.33 |
|       | G9920   | 6.3  | 2.8  | 0.0    | 5.7   | 2.38 |
|       | G9921   | 6.7  | 2.3  | 0.0    | 7.2   | 2.34 |
|       | G9922   | 6.2  | 2.5  | 0.0    | 0.0   | 2.35 |
|       | G9923   | 6.0  | 2.6  | 0.0    | 0.0   | 2.32 |
|       | G9924   | 5.1  | 2.6  | 0.0    | 0.0   | 2.26 |
|       | G9925   | 5.5  | 2.4  | 0.0    | 8.2   | 2.36 |
|       | G9926   | 6.2  | 2.4  | 0.0    | 0.0   | 2.32 |
|       | G9927   | 6.3  | 2.6  | 0.0    | 0.0   | 2.22 |
|       | G9928   | 6.3  | 2.7  | 0.0    | 13.5  | 2.20 |
|       | G9929   | 5.4  | 2.2  | 0.0    | 0.0   | 2.25 |
|       | G9930   | 5.4  | 2.1  | 0.0    | 0.0   | 2.29 |
|       | G9932   | 5.6  | 2.6  | 0.0    | 0.0   | 2.33 |
|       | G9933   | 5.5  | 2.9  | 0.0    | 0.0   | 2.23 |
|       | G9934   | 4.3  | 2.3  | 0.0    | 7.9   | 2.36 |
|       | G9935   | 5.1  | 2.1  | 0.0    | 10.0  | 2.32 |
|       | G9936   | 5.8  | 2.6  | 0.0    | 0.0   | 2.30 |
| C     | G9937   | 4.1  | 2.8  | 0.0    | 17.7  | 2.16 |
|       | G9938   | 6.8  | 2.6  | 0.0    | 8.0   | 2.27 |
|       | G9939   | 6.6  | 2.5  | 0.0    | 4.5   | 2.28 |
|       | G9940   | 6.0  | 2.0  | 0.0    | 6.3   | 2.33 |
|       | G9941   | 6.4  | 2.5  | 0.0    | 6.3   | 2.30 |
|       | G9942   | 6.6  | 2.6  | 0.0    | 5.0   | 2.29 |
|       | G9943   | 6.2  | 3.7  | 0.0    | 8.2   | 2.23 |
|       | G9944   | 5.5  | 2.3  | 0.0    | 0.0   | 2.42 |
|       | G9945   | 5.7  | 2.6  | 0.0    | 0.0   | 2.34 |
|       | G9946   | 5.8  | 2.2  | 0.0    | 12.5  | 2.32 |
|       | G9947   | 5.5  | 2.4  | 0.0    | 0.0   | 2.28 |
| C     | G9948   | 7.1  | 2.7  | 0.0    | 12.5  | 2.20 |
|       | G9949   | 5.2  | 2.6  | 0.0    | 0.0   | 2.37 |
|       | G9950   | 6.5  | 2.8  | 0.0    | 4.0   | 2.35 |
| B     | G12131  | 6.1  | 2.1  | 0.0    | 3.9   | 2.43 |
|       | G12132  | 5.7  | 2.1  | 0.0    | 0.0   | 2.34 |
| B     | G12133  | 5.5  | 2.0  | 0.0    | 0.0   | 2.44 |
|       | G12134  | 5.8  | 2.1  | 0.0    | 0.0   | 2.37 |
| B     | G12135  | 5.9  | 1.8  | 0.0    | 0.0   | 2.44 |
|       | G12136  | 6.2  | 1.9  | 0.0    | 0.0   | 2.32 |
|       | G12137  | 6.5  | 2.3  | 0.0    | 0.0   | 2.32 |
|       | G12138  | 6.0  | 2.6  | 0.0    | 0.0   | 2.39 |
|       | G12139  | 5.9  | 2.0  | 0.0    | 0.0   | 2.27 |
| B     | G12141  | 5.6  | 2.2  | 0.0    | 0.0   | 2.45 |
| B     | G12142  | 5.7  | 2.1  | 0.0    | 0.0   | 2.43 |
|       | G12147  | 6.2  | 2.0  | 0.0    | 5.3   | 2.14 |
|       | G12149  | 5.7  | 2.3  | 0.0    | 0.0   | 2.35 |
|       | G12150  | 6.4  | 2.3  | 0.0    | 0.0   | 2.31 |
|       | G12151  | 5.2  | 3.0  | 0.0    | 8.4   | 2.19 |
| C     | G12152  | 6.1  | 2.2  | 0.0    | 0.0   | 2.20 |
| C     | G12153  | 5.6  | 0.0  | 0.0    | 0.0   | 2.20 |
| C     | G12154  | 6.2  | 0.0  | 0.0    | 0.0   | 2.21 |
|       | G12155  | 6.0  | 2.4  | 0.0    | 0.0   | 2.22 |
|       | G12156  | 6.2  | 0.0  | 0.0    | 0.0   | 2.13 |
|       | G12158  | 6.4  | 1.9  | 0.0    | 11.4  | 2.32 |
|       | G12161  | 5.4  | 2.0  | 0.0    | 12.5  | 2.46 |
| B     | G12163  | 6.4  | 2.5  | 0.0    | 0.0   | 2.32 |
|       | G12164  | 6.4  | 2.9  | 0.0    | 0.0   | 2.34 |
| A     | G12166  | 4.69 | 2.17 | ND     | 100   | 2.39 |
|       | G12169  | 6.4  | 2.6  | 0.0    | 10.6  | 2.32 |
| A     | G12170  | 5.63 | 2.76 | ND     | 100   | 2.43 |
|       | G12174  | 6.3  | 1.9  | 0.0    | 6.8   | 2.33 |
|       | G12175  | 6.2  | 2.1  | 0.0    | 0.0   | 2.30 |
|       | G12177  | 7.0  | 2.4  | 0.0    | 7.8   | 2.25 |
| A     | G12179  | 4.4  | 1.7  | 0.0    | 100.0 | 2.42 |
| A     | G12180  | 4.36 | 2.02 | ND     | 100   | 2.46 |
|       | G12181  | 6.39 | 2.02 | ND     | 0     | 2.39 |
|       | average | 5.9  | 2.3  | 0.0    | 8.3   | 2.3  |
|       | median  | 6.0  | 2.4  | 0.0    | 0.0   | 2.3  |
|       | st.dev. | 0.65 | 0.58 | 0.00   | 22.35 | 0.08 |
|       | min     | 4.1  | 0.0  | 0.0    | 0.0   | 2.1  |
|       | max     | 7.1  | 3.7  | 0.0    | 100.0 | 2.5  |

**Table S13** - Linkage region and sulfation degree of 75 porcine crude heparin samples. NB: 0 value means <LOD

The alignment algorithm was developed by a modification of the algorithm contained in the R “ptw” (Parametric Time Warping) alignment package<sup>(1)</sup> and works as follows: if the original abscissa is 1, ..., n, then the signal of the aligned spectrum at k will be equal to the intensity of the original spectrum at

$$s(k) = k + \sum_{i=1}^d a_i \cdot \sin\left(\pi \frac{i(k-1)}{n-1}\right)$$

The user has to select  $d$  and the initial values for the  $a_i$  coefficients, which are optimized by the software by minimizing the distance between the aligned spectrum and the reference spectrum.

If  $s(k)$  is not an integer, the algorithm interpolates between the intensities at the two integers closest to  $s(k)$ .

The equally spaced abscissa values (ppm) of the NMR spectrum are mapped to and from 1, ..., n in the obvious way before and after the application of the algorithm.

<sup>(1)</sup> T.G. Bloemberg, J. Gerretzen, H.J.P. Wouters, J. Gloerich, M. van Dael, H.J.C.T. Wessels, L.P. van den Heuvel, P.H.C. Eilers, L.M.C. Buydens, R. Wehrens, Improved parametric time warping for proteomics, *Chemometr. Intell. Lab.* 2010, 104, 65-74. DOI: 10.1016/j.chemolab.2010.04.008. R. Wehrens, T.G. Bloemberg, P.H.C. Eilers, Fast parametric time warping of peak lists, *Bioinformatics* 2015, 31, 3063-3065. DOI: 10.1093/bioinformatics/btv299.

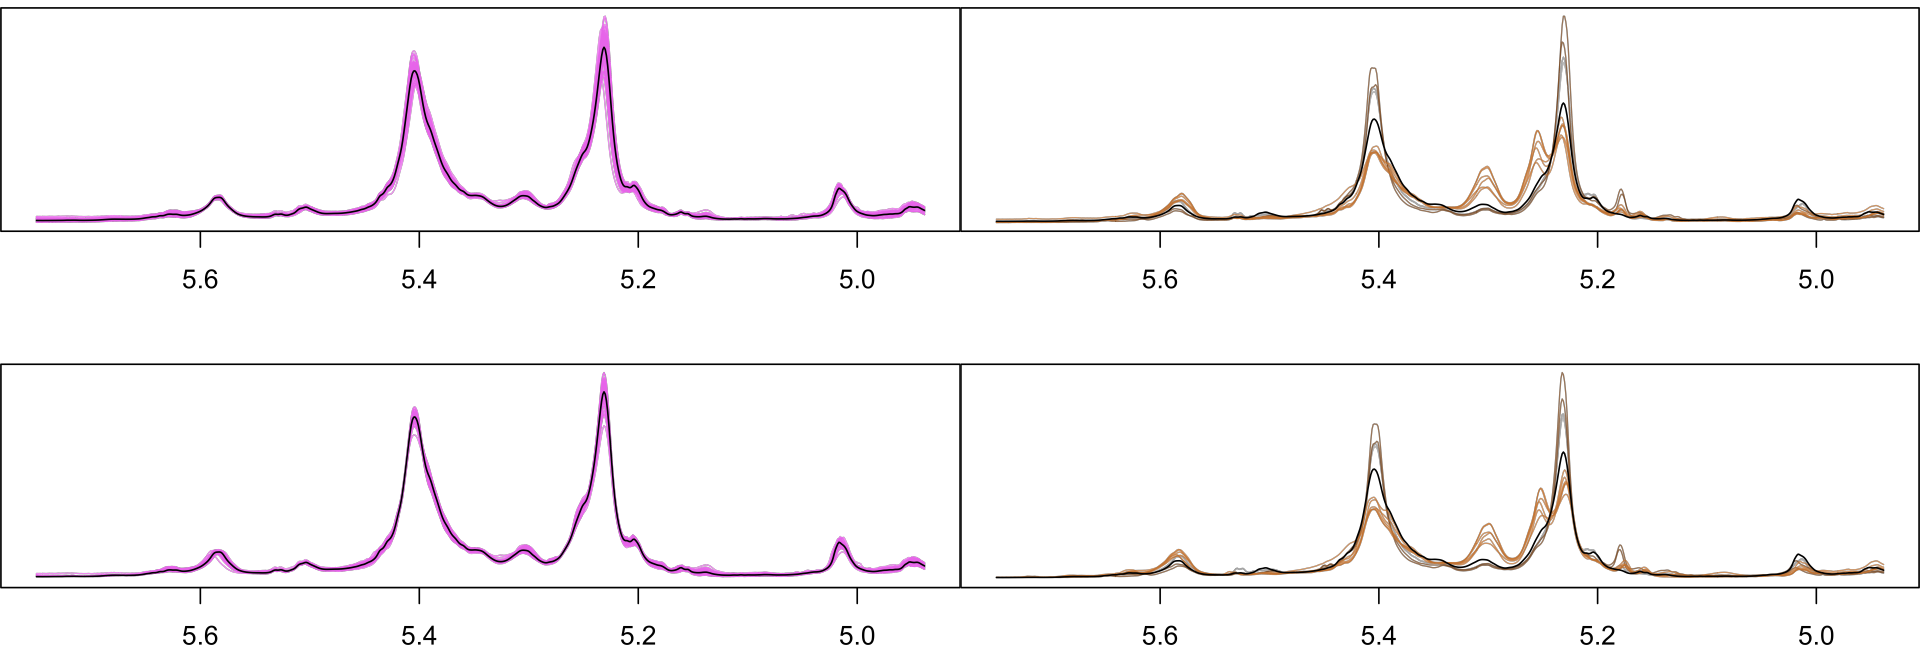

**Figure S9** – Alignment algorithm. Black lines=reference spectrum. Pink lines=PMHC spectra. Grey lines=OMHC spectra. Dark brown lines=BMHC spectra. Light brown lines=BLCH spectra. Top panels shows spectra before alignment. Bottom panels show spectra after alignment.
